# Supplementary material for: [Retracted] Transcriptional Profiling Uncovers Biologically Significant RNAs and Regulatory Networks in Nucleus Pulposus from Intervertebral Disc Degeneration Patients
Source: Hindawi journal article supplement (doi:10.1155/2021/6696335), 2021-01-01
Supplement: f3 [file 6696335.f3.pdf]

|        | ID     | Name                        | miRNA_ID_LIST               | SPOT_ID | logFC        | AveExpr      | t            | P.Value    | adj.P.Val   | B            |
|--------|--------|-----------------------------|-----------------------------|---------|--------------|--------------|--------------|------------|-------------|--------------|
| 148384 | 148384 | hsa-miR-3648                | hsa-miR-3648                |         | -4.725398088 | -1.520129316 | -8.186969045 | 1.30E-06   | 0.00120161  | 5.602831872  |
| 46258  | 46258  | hsa-miR-1184                | hsa-miR-1184                |         | -6.191671925 | -1.389290843 | -7.39563681  | 6.39E-06   | 0.001555063 | 4.124285917  |
| 168925 | 168925 | hsa-miR-1273g-3p            | hsa-miR-1273g-3p            |         | -3.251300603 | -2.043935507 | -5.624287588 | 9.42E-05   | 0.005462031 | 1.682504634  |
| 168964 | 168964 | hsa-miR-4450                | hsa-miR-4450                |         | 3.960827517  | -3.476999249 | 5.581706945  | 0.00010104 | 0.005462031 | 1.620609423  |
| 46810  | 46810  | hsa-miR-1827                | hsa-miR-1827                |         | -2.660808987 | 0.015967153  | -5.353381978 | 0.0001136  | 0.005753462 | 1.474243908  |
| 145705 | 145705 | hsa-miR-431-5p              | hsa-miR-431-5p              |         | 3.421226252  | -2.458742292 | 5.303146814  | 0.00012418 | 0.005753462 | 1.389737313  |
| 169328 | 169328 | hsa-miR-4769-5p             | hsa-miR-4769-5p             |         | -2.619278614 | -1.185619393 | -5.234381598 | 0.00014035 | 0.005937475 | 1.273447635  |
| 168753 | 168753 | hsa-miR-4741                | hsa-miR-4741                |         | 2.52534813   | -0.529510987 | 5.20057384   | 0.0001491  | 0.006044573 | 1.216018105  |
| 17953  | 17953  | hsa-miR-183-3p              | hsa-miR-183-3p              |         | 2.789528702  | 1.748288646  | 5.095351954  | 0.00018013 | 0.007010547 | 1.036207833  |
| 10964  | 10964  | hsa-miR-155-5p              | hsa-miR-155-5p              |         | -5.813785139 | -4.568512234 | -5.509219993 | 0.00021269 | 0.007391094 | 0.782056967  |
| 145905 | 145905 | hsa-miR-518a-5p/hsa-miR-527 | hsa-miR-518a-5p,hsa-miR-527 |         | 2.763264949  | -4.306624606 | 4.741466203  | 0.00034383 | 0.009404933 | 0.420056862  |
| 46443  | 46443  | hsa-miR-193a-5p             | hsa-miR-193a-5p             |         | -4.663055668 | -5.890350259 | -5.190030822 | 0.00034139 | 0.009404933 | 0.399672984  |
| 148509 | 148509 | hsa-miR-328-5p              | hsa-miR-328-5p              |         | 3.084794986  | -3.644747682 | 4.485983843  | 0.0005536  | 0.012526877 | -0.034872606 |
| 168850 | 168850 | hsa-miR-3191-5p             | hsa-miR-3191-5p             |         | 3.068555618  | -3.544971753 | 4.447817326  | 0.00059482 | 0.012861239 | -0.103495647 |
| 467    | 467    | hsa-miR-4657                | hsa-miR-                    |         | -            | -            | -            | 0.0006     | 0.01426     | -            |

|            |            |                  |                      |  |                      |                      |                      |                |                 |                      |
|------------|------------|------------------|----------------------|--|----------------------|----------------------|----------------------|----------------|-----------------|----------------------|
| 31         | 31         |                  | 4657                 |  | 2.47668<br>3182      | 3.16545<br>3075      | 4.47342<br>9592      | 8145           | 608             | 0.17233<br>6292      |
| 168<br>898 | 168<br>898 | hsa-miR-5008-3p  | hsa-miR-<br>5008-3p  |  | 2.37968<br>0179      | -<br>1.36608<br>5096 | 4.36986<br>516       | 0.0006<br>8911 | 0.01426<br>608  | -<br>0.24414<br>9418 |
| 329<br>46  | 329<br>46  | hsa-miR-486-5p   | hsa-miR-<br>486-5p   |  | -<br>2.13448<br>8402 | -<br>0.79674<br>3619 | -<br>4.32040<br>2513 | 0.0007<br>5681 | 0.01443<br>8755 | -<br>0.33373<br>0594 |
| 168<br>973 | 168<br>973 | hsa-miR-1268b    | hsa-miR-<br>1268b    |  | -<br>3.39342<br>7695 | -<br>6.71909<br>9169 | -<br>4.51642<br>4527 | 0.0009<br>7183 | 0.01463<br>4289 | -<br>0.40943<br>4005 |
| 168<br>672 | 168<br>672 | hsa-miR-1587     | hsa-miR-<br>1587     |  | -<br>2.26557<br>2612 | -<br>1.29702<br>6499 | -<br>4.26340<br>893  | 0.0008<br>4337 | 0.01455<br>2797 | -<br>0.43725<br>6633 |
| 168<br>878 | 168<br>878 | hsa-miR-5100     | hsa-miR-<br>5100     |  | -<br>2.47965<br>5557 | 3.25507<br>3245      | -<br>4.25875<br>9022 | 0.0008<br>5087 | 0.01455<br>2797 | -<br>0.44571<br>6966 |
| 168<br>564 | 168<br>564 | hsa-miR-548at-5p | hsa-miR-<br>548at-5p |  | 2.74954<br>0916      | -<br>0.85317<br>5069 | 4.23263<br>6532      | 0.0008<br>9427 | 0.01455<br>2797 | -<br>0.49328<br>4122 |
| 147<br>722 | 147<br>722 | hsa-miR-4306     | hsa-miR-<br>4306     |  | -<br>2.07997<br>8277 | 4.60212<br>4707      | -<br>4.21934<br>1598 | 0.0009<br>1723 | 0.01455<br>2797 | -<br>0.51751<br>7845 |
| 147<br>776 | 147<br>776 | hsa-miR-4317     | hsa-miR-<br>4317     |  | 2.59319<br>5732      | -<br>3.78648<br>2267 | 4.21844<br>1439      | 0.0009<br>1881 | 0.01455<br>2797 | -<br>0.51915<br>9227 |
| 169<br>326 | 169<br>326 | hsa-miR-451b     | hsa-miR-<br>451b     |  | 3.23154<br>9251      | -<br>2.65918<br>3391 | 4.21361<br>3092      | 0.0009<br>2731 | 0.01455<br>2797 | -<br>0.52796<br>4689 |
| 428<br>11  | 428<br>11  | hsa-miR-542-5p   | hsa-miR-<br>542-5p   |  | -<br>3.03537<br>59   | -<br>0.59940<br>108  | -<br>4.19702<br>1187 | 0.0009<br>5715 | 0.01463<br>4289 | -<br>0.55823<br>9623 |
| 169<br>306 | 169<br>306 | hsa-miR-4758-5p  | hsa-miR-<br>4758-5p  |  | 2.65297<br>7966      | -<br>3.08644<br>5221 | 4.16272<br>8262      | 0.0010<br>2198 | 0.01506<br>6474 | -<br>0.62089<br>1636 |
| 169<br>015 | 169<br>015 | hsa-miR-4454     | hsa-miR-<br>4454     |  | -<br>4.11497<br>0902 | 1.18253<br>1321      | -<br>4.16903<br>4417 | 0.0011<br>8317 | 0.01644<br>6034 | -<br>0.69395<br>8644 |
| 168<br>870 | 168<br>870 | hsa-miR-1246     | hsa-miR-<br>1246     |  | -<br>4.17443<br>9657 | -<br>0.95627<br>2496 | -<br>4.10291<br>9246 | 0.0011<br>4604 | 0.01616<br>082  | -<br>0.73040<br>3688 |
| 169<br>355 | 169<br>355 | hsa-miR-2355-5p  | hsa-miR-<br>2355-5p  |  | 2.69097<br>2423      | -<br>5.14327<br>7677 | 4.14794<br>7392      | 0.0014<br>6131 | 0.01870<br>8632 | -<br>0.84298<br>8756 |

|            |            |                   |                   |  |                      |                      |                      |                |                 |                      |
|------------|------------|-------------------|-------------------|--|----------------------|----------------------|----------------------|----------------|-----------------|----------------------|
| 428<br>12  | 428<br>12  | hsa-miR-508-5p    | hsa-miR-508-5p    |  | 2.48168<br>6287      | 0.51497<br>627       | 3.94313<br>0654      | 0.0015<br>5884 | 0.01944<br>5571 | -<br>1.02434<br>7812 |
| 148<br>351 | 148<br>351 | hsa-miR-3945      | hsa-miR-3945      |  | 2.20527<br>8555      | -<br>1.90540<br>2088 | 3.88708<br>2319      | 0.0017<br>3731 | 0.02104<br>3045 | -<br>1.12786<br>4738 |
| 168<br>675 | 168<br>675 | hsa-miR-4433-3p   | hsa-miR-4433-3p   |  | -<br>3.61330<br>6309 | -<br>3.63751<br>2139 | -<br>3.72448<br>7762 | 0.0026<br>9443 | 0.02880<br>9725 | -<br>1.47271<br>4364 |
| 147<br>845 | 147<br>845 | hsa-miR-3173-3p   | hsa-miR-3173-3p   |  | -<br>2.08976<br>8872 | -<br>2.82094<br>6405 | -<br>3.60965<br>8322 | 0.0029<br>801  | 0.03117<br>8905 | -<br>1.64246<br>7214 |
| 145<br>838 | 145<br>838 | hsa-miR-125b-1-3p | hsa-miR-125b-1-3p |  | -<br>4.07693<br>0026 | -<br>5.85840<br>7507 | -<br>3.66336<br>9509 | 0.0039<br>8988 | 0.03732<br>8385 | -<br>1.70624<br>9627 |
| 427<br>00  | 427<br>00  | hsa-miR-631       | hsa-miR-631       |  | 2.00183<br>6712      | -<br>1.90929<br>9113 | 3.55448<br>3966      | 0.0033<br>1936 | 0.03240<br>3749 | -<br>1.74509<br>0097 |
| 147<br>796 | 147<br>796 | hsa-miR-4327      | hsa-miR-4327      |  | -<br>3.67864<br>2963 | -<br>6.83845<br>3096 | -<br>3.64160<br>8012 | 0.0048<br>7305 | 0.04052<br>5485 | -<br>1.82028<br>4135 |
| 168<br>846 | 168<br>846 | hsa-miR-1273f     | hsa-miR-1273f     |  | -<br>3.05907<br>6662 | -<br>3.77708<br>7044 | -<br>3.51221<br>671  | 0.0051<br>6932 | 0.04191<br>4582 | -<br>1.90155<br>6111 |
| 168<br>572 | 168<br>572 | hsa-miR-4507      | hsa-miR-4507      |  | -<br>2.33595<br>2231 | -<br>3.57222<br>2744 | -<br>3.45859<br>6936 | 0.0044<br>4118 | 0.03858<br>2739 | -<br>1.94480<br>6703 |
| 147<br>817 | 147<br>817 | hsa-miR-3196      | hsa-miR-3196      |  | 2.01246<br>0767      | -<br>1.61291<br>5637 | 3.43032<br>1957      | 0.0042<br>3257 | 0.03813<br>2298 | -<br>1.97610<br>8277 |
| 168<br>631 | 168<br>631 | hsa-miR-4723-5p   | hsa-miR-4723-5p   |  | 2.25405<br>4918      | -<br>3.81554<br>9233 | 3.41027<br>3901      | 0.0048<br>6547 | 0.04052<br>5485 | -<br>2.04853<br>7648 |
| 169<br>096 | 169<br>096 | hsa-miR-4804-3p   | hsa-miR-4804-3p   |  | 4.57539<br>6971      | -<br>6.34284<br>8063 | 3.63800<br>4042      | 0.0072<br>7912 | 0.05325<br>2517 | -<br>2.10188<br>8719 |
| 145<br>745 | 145<br>745 | hsa-miR-335-3p    | hsa-miR-335-3p    |  | -<br>2.56730<br>4518 | -<br>2.72050<br>5065 | -<br>3.31184<br>2058 | 0.0058<br>6097 | 0.04562<br>1774 | -<br>2.20621<br>9549 |
| 169<br>265 | 169<br>265 | hsa-miR-4733-3p   | hsa-miR-4733-3p   |  | 3.87554<br>3585      | -<br>5.63871<br>9807 | 3.39547<br>5798      | 0.0085<br>3036 | 0.06064<br>8574 | -<br>2.26800<br>3681 |
| 464<br>79  | 464<br>79  | hsa-miR-1304-5p   | hsa-miR-1304-5p   |  | -<br>3.07140         | -<br>4.85263         | -<br>3.11813         | 0.0102<br>458  | 0.06735<br>9189 | -<br>2.49775         |

|            |            |                       |                       |  |                      |                      |                      |                |                 |                      |
|------------|------------|-----------------------|-----------------------|--|----------------------|----------------------|----------------------|----------------|-----------------|----------------------|
|            |            |                       |                       |  | 4346                 | 6099                 | 1937                 |                |                 | 8034                 |
| 169<br>020 | 169<br>020 | hsa-miR-4506          | hsa-miR-<br>4506      |  | 2.80245<br>9326      | -<br>3.99192<br>4719 | 3.06617<br>7504      | 0.0125<br>3889 | 0.07673<br>1718 | -<br>2.70313<br>6339 |
| 1112<br>1  | 111<br>21  | hsa-miR-489-3p        | hsa-miR-<br>489-3p    |  | 2.61649<br>1839      | -<br>4.47706<br>376  | 3.01495<br>9591      | 0.0095<br>5541 | 0.06391<br>7371 | -<br>2.74573<br>6638 |
| 168<br>646 | 168<br>646 | hsa-miR-4731-3p       | hsa-miR-<br>4731-3p   |  | 2.50704<br>3293      | -<br>4.26233<br>508  | 2.98410<br>8435      | 0.0101<br>4999 | 0.06718<br>329  | -<br>2.80243<br>9109 |
| 148<br>032 | 148<br>032 | hsa-miR-3685          | hsa-miR-<br>3685      |  | -<br>3.13862<br>4821 | -<br>4.25301<br>8476 | -<br>2.95964<br>5053 | 0.0114<br>2505 | 0.07117<br>0929 | -<br>2.83211<br>9892 |
| 426<br>03  | 426<br>03  | hsa-miR-424-3p        | hsa-miR-<br>424-3p    |  | 2.00139<br>2229      | -<br>4.22899<br>3517 | 2.82897<br>5398      | 0.0137<br>3971 | 0.08053<br>4552 | -<br>3.08593<br>1068 |
| 168<br>776 | 168<br>776 | hsa-miR-4795-3p       | hsa-miR-<br>4795-3p   |  | -<br>2.99236<br>5155 | -<br>3.42122<br>6761 | -<br>2.64314<br>9373 | 0.0235<br>8378 | 0.11303<br>9483 | -<br>3.22427<br>8346 |
| 169<br>218 | 169<br>218 | hsa-miR-5189-5p       | hsa-miR-<br>5189-5p   |  | 3.09127<br>709       | -<br>5.97945<br>7846 | 2.67636<br>2478      | 0.0295<br>4636 | 0.13263<br>1227 | -<br>3.28572<br>6208 |
| 147<br>701 | 147<br>701 | hsa-miR-491-3p        | hsa-miR-<br>491-3p    |  | -<br>3.73010<br>952  | -<br>3.44266<br>95   | -<br>2.62880<br>3991 | 0.0285<br>6462 | 0.13006<br>3494 | -<br>3.31185<br>8779 |
| 463<br>36  | 463<br>36  | hsa-miR-1284          | hsa-miR-<br>1284      |  | -<br>3.16390<br>203  | -<br>4.49509<br>3133 | -<br>2.66043<br>206  | 0.0201<br>0242 | 0.10448<br>4426 | -<br>3.35664<br>724  |
| 145<br>754 | 145<br>754 | hsa-miR-523-3p        | hsa-miR-<br>523-3p    |  | 2.86495<br>7542      | -<br>7.41470<br>4493 | 2.55927<br>6981      | 0.0319<br>3406 | 0.13395<br>8915 | -<br>3.40825<br>1644 |
| 1110<br>8  | 111<br>08  | hsa-miR-425-3p        | hsa-miR-<br>425-3p    |  | 2.22479<br>5731      | -<br>6.59221<br>2724 | 2.57431<br>068       | 0.0286<br>2863 | 0.13006<br>3494 | -<br>3.45627<br>7523 |
| 428<br>45  | 428<br>45  | hsa-miR-125b-2-<br>3p | hsa-miR-<br>125b-2-3p |  | -<br>2.25237<br>602  | -<br>5.33511<br>1421 | -<br>2.50341<br>041  | 0.0322<br>5719 | 0.13395<br>8915 | -<br>3.46067<br>9529 |
| 169<br>043 | 169<br>043 | hsa-miR-4462          | hsa-miR-<br>4462      |  | 2.51594<br>9721      | -<br>6.69883<br>2168 | 2.47212<br>6738      | 0.0367<br>2993 | 0.14295<br>2887 | -<br>3.59632<br>9887 |
| 147<br>916 | 147<br>916 | hsa-miR-3126-3p       | hsa-miR-<br>3126-3p   |  | 2.87612<br>2084      | -<br>4.55596<br>7005 | 2.39321<br>5919      | 0.0365<br>2763 | 0.14273<br>6481 | -<br>3.60268<br>9329 |
| 110        | 110        | hsa-miR-299-3p        | hsa-miR-              |  | 2.69813              | -                    | 2.38760              | 0.0457         | 0.16373         | -                    |

|            |            |                  |                      |  |                      |                      |                      |                |                 |                      |
|------------|------------|------------------|----------------------|--|----------------------|----------------------|----------------------|----------------|-----------------|----------------------|
| 37         | 37         |                  | 299-3p               |  | 8087                 | 7.44286<br>3694      | 1989                 | 727            | 8388            | 3.65948<br>8137      |
| 462<br>21  | 462<br>21  | hsa-miR-519d-3p  | hsa-miR-<br>519d-3p  |  | -<br>2.05411<br>8576 | -<br>6.03411<br>0456 | -<br>2.40590<br>4376 | 0.0323<br>3109 | 0.13395<br>8915 | -<br>3.79210<br>1056 |
| 169<br>384 | 169<br>384 | hsa-miR-1295b-5p | hsa-miR-<br>1295b-5p |  | 2.61142<br>141       | -<br>4.78027<br>4051 | 2.25476<br>0393      | 0.0489<br>5657 | 0.16713<br>5968 | -<br>3.81988<br>6993 |
| 169<br>305 | 169<br>305 | hsa-miR-4455     | hsa-miR-<br>4455     |  | -<br>2.29837<br>8155 | -<br>4.15987<br>6374 | -<br>2.32463<br>8468 | 0.0375<br>6457 | 0.14537<br>6458 | -<br>3.92817<br>9286 |
