# Supplementary material for: [Retracted] Transcriptional Profiling Uncovers Biologically Significant RNAs and Regulatory Networks in Nucleus Pulposus from Intervertebral Disc Degeneration Patients
Source: Hindawi journal article supplement (doi:10.1155/2021/6696335), 2021-01-01
Supplement: f4 [file 6696335.f4.pdf]

|    | Genes       |
|----|-------------|
| 1  | ASCRP000002 |
| 2  | ASCRP000004 |
| 3  | ASCRP000005 |
| 4  | ASCRP000006 |
| 5  | ASCRP000007 |
| 6  | ASCRP000008 |
| 7  | ASCRP000010 |
| 8  | ASCRP000011 |
| 9  | ASCRP000012 |
| 10 | ASCRP000016 |
| 11 | ASCRP000017 |
| 12 | ASCRP000019 |
| 13 | ASCRP000022 |
| 14 | ASCRP000025 |
| 15 | ASCRP000026 |
| 16 | ASCRP000027 |
| 17 | ASCRP000028 |
| 18 | ASCRP000029 |
| 19 | ASCRP000031 |
| 20 | ASCRP000043 |
| 21 | ASCRP000044 |
| 22 | ASCRP000045 |
| 23 | ASCRP000047 |
| 24 | ASCRP000048 |
| 25 | ASCRP000049 |
| 26 | ASCRP000051 |
| 27 | ASCRP000053 |
| 28 | ASCRP000054 |
| 29 | ASCRP000055 |
| 30 | ASCRP000056 |
| 31 | ASCRP000058 |
| 32 | ASCRP000061 |
| 33 | ASCRP000063 |
| 34 | ASCRP000064 |
| 35 | ASCRP000069 |
| 36 | ASCRP000071 |
| 37 | ASCRP000073 |
| 38 | ASCRP000074 |
| 39 | ASCRP000075 |
| 40 | ASCRP000077 |
| 41 | ASCRP000078 |
| 42 | ASCRP000080 |

|    |             |
|----|-------------|
| 43 | ASCRP000083 |
| 44 | ASCRP000085 |
| 45 | ASCRP000086 |
| 46 | ASCRP000087 |
| 47 | ASCRP000088 |
| 48 | ASCRP000089 |
| 49 | ASCRP000091 |
| 50 | ASCRP000093 |
| 51 | ASCRP000094 |
| 52 | ASCRP000096 |
| 53 | ASCRP000097 |
| 54 | ASCRP000098 |
| 55 | ASCRP000104 |
| 56 | ASCRP000105 |
| 57 | ASCRP000110 |
| 58 | ASCRP000111 |
| 59 | ASCRP000113 |
| 60 | ASCRP000115 |
| 61 | ASCRP000116 |
| 62 | ASCRP000121 |
| 63 | ASCRP000122 |
| 64 | ASCRP000124 |
| 65 | ASCRP000125 |
| 66 | ASCRP000126 |
| 67 | ASCRP000129 |
| 68 | ASCRP000131 |
| 69 | ASCRP000137 |
| 70 | ASCRP000140 |
| 71 | ASCRP000142 |
| 72 | ASCRP000143 |
| 73 | ASCRP000144 |
| 74 | ASCRP000147 |
| 75 | ASCRP000148 |
| 76 | ASCRP000150 |
| 77 | ASCRP000153 |
| 78 | ASCRP000155 |
| 79 | ASCRP000156 |
| 80 | ASCRP000157 |
| 81 | ASCRP000158 |
| 82 | ASCRP000159 |
| 83 | ASCRP000160 |
| 84 | ASCRP000161 |
| 85 | ASCRP000162 |

|     |             |
|-----|-------------|
| 86  | ASCRP000166 |
| 87  | ASCRP000167 |
| 88  | ASCRP000170 |
| 89  | ASCRP000172 |
| 90  | ASCRP000173 |
| 91  | ASCRP000174 |
| 92  | ASCRP000175 |
| 93  | ASCRP000176 |
| 94  | ASCRP000177 |
| 95  | ASCRP000178 |
| 96  | ASCRP000179 |
| 97  | ASCRP000180 |
| 98  | ASCRP000181 |
| 99  | ASCRP000182 |
| 100 | ASCRP000184 |
| 101 | ASCRP000185 |
| 102 | ASCRP000189 |
| 103 | ASCRP000192 |
| 104 | ASCRP000193 |
| 105 | ASCRP000194 |
| 106 | ASCRP000195 |
| 107 | ASCRP000199 |
| 108 | ASCRP000200 |
| 109 | ASCRP000201 |
| 110 | ASCRP000204 |
| 111 | ASCRP000205 |
| 112 | ASCRP000212 |
| 113 | ASCRP000217 |
| 114 | ASCRP000219 |
| 115 | ASCRP000220 |
| 116 | ASCRP000223 |
| 117 | ASCRP000224 |
| 118 | ASCRP000225 |
| 119 | ASCRP000226 |
| 120 | ASCRP000228 |
| 121 | ASCRP000230 |
| 122 | ASCRP000231 |
| 123 | ASCRP000232 |
| 124 | ASCRP000235 |
| 125 | ASCRP000236 |
| 126 | ASCRP000239 |
| 127 | ASCRP000240 |
| 128 | ASCRP000242 |

|     |             |
|-----|-------------|
| 129 | ASCRP000244 |
| 130 | ASCRP000245 |
| 131 | ASCRP000247 |
| 132 | ASCRP000248 |
| 133 | ASCRP000249 |
| 134 | ASCRP000250 |
| 135 | ASCRP000253 |
| 136 | ASCRP000255 |
| 137 | ASCRP000256 |
| 138 | ASCRP000257 |
| 139 | ASCRP000259 |
| 140 | ASCRP000260 |
| 141 | ASCRP000262 |
| 142 | ASCRP000263 |
| 143 | ASCRP000264 |
| 144 | ASCRP000265 |
| 145 | ASCRP000266 |
| 146 | ASCRP000267 |
| 147 | ASCRP000268 |
| 148 | ASCRP000269 |
| 149 | ASCRP000272 |
| 150 | ASCRP000275 |
| 151 | ASCRP000278 |
| 152 | ASCRP000279 |
| 153 | ASCRP000281 |
| 154 | ASCRP000282 |
| 155 | ASCRP000284 |
| 156 | ASCRP000285 |
| 157 | ASCRP000286 |
| 158 | ASCRP000294 |
| 159 | ASCRP000299 |
| 160 | ASCRP000300 |
| 161 | ASCRP000301 |
| 162 | ASCRP000302 |
| 163 | ASCRP000303 |
| 164 | ASCRP000310 |
| 165 | ASCRP000311 |
| 166 | ASCRP000313 |
| 167 | ASCRP000314 |
| 168 | ASCRP000316 |
| 169 | ASCRP000317 |
| 170 | ASCRP000319 |
| 171 | ASCRP000322 |

|     |             |
|-----|-------------|
| 172 | ASCRP000323 |
| 173 | ASCRP000325 |
| 174 | ASCRP000328 |
| 175 | ASCRP000329 |
| 176 | ASCRP000333 |
| 177 | ASCRP000334 |
| 178 | ASCRP000335 |
| 179 | ASCRP000338 |
| 180 | ASCRP000339 |
| 181 | ASCRP000340 |
| 182 | ASCRP000341 |
| 183 | ASCRP000343 |
| 184 | ASCRP000347 |
| 185 | ASCRP000348 |
| 186 | ASCRP000349 |
| 187 | ASCRP000350 |
| 188 | ASCRP000351 |
| 189 | ASCRP000352 |
| 190 | ASCRP000354 |
| 191 | ASCRP000355 |
| 192 | ASCRP000356 |
| 193 | ASCRP000360 |
| 194 | ASCRP000365 |
| 195 | ASCRP000370 |
| 196 | ASCRP000371 |
| 197 | ASCRP000372 |
| 198 | ASCRP000374 |
| 199 | ASCRP000375 |
| 200 | ASCRP000379 |
| 201 | ASCRP000380 |
| 202 | ASCRP000383 |
| 203 | ASCRP000384 |
| 204 | ASCRP000385 |
| 205 | ASCRP000386 |
| 206 | ASCRP000389 |
| 207 | ASCRP000390 |
| 208 | ASCRP000391 |
| 209 | ASCRP000394 |
| 210 | ASCRP000395 |
| 211 | ASCRP000396 |
| 212 | ASCRP000397 |
| 213 | ASCRP000398 |
| 214 | ASCRP000399 |

|     |             |
|-----|-------------|
| 215 | ASCRP000401 |
| 216 | ASCRP000403 |
| 217 | ASCRP000406 |
| 218 | ASCRP000407 |
| 219 | ASCRP000408 |
| 220 | ASCRP000410 |
| 221 | ASCRP000411 |
| 222 | ASCRP000412 |
| 223 | ASCRP000414 |
| 224 | ASCRP000415 |
| 225 | ASCRP000417 |
| 226 | ASCRP000418 |
| 227 | ASCRP000419 |
| 228 | ASCRP000421 |
| 229 | ASCRP000422 |
| 230 | ASCRP000423 |
| 231 | ASCRP000424 |
| 232 | ASCRP000425 |
| 233 | ASCRP000426 |
| 234 | ASCRP000427 |
| 235 | ASCRP000428 |
| 236 | ASCRP000429 |
| 237 | ASCRP000430 |
| 238 | ASCRP000431 |
| 239 | ASCRP000432 |
| 240 | ASCRP000435 |
| 241 | ASCRP000437 |
| 242 | ASCRP000438 |
| 243 | ASCRP000440 |
| 244 | ASCRP000441 |
| 245 | ASCRP000442 |
| 246 | ASCRP000443 |
| 247 | ASCRP000448 |
| 248 | ASCRP000453 |
| 249 | ASCRP000456 |
| 250 | ASCRP000458 |
| 251 | ASCRP000459 |
| 252 | ASCRP000460 |
| 253 | ASCRP000461 |
| 254 | ASCRP000462 |
| 255 | ASCRP000463 |
| 256 | ASCRP000465 |
| 257 | ASCRP000466 |

|     |             |
|-----|-------------|
| 258 | ASCRP000469 |
| 259 | ASCRP000473 |
| 260 | ASCRP000474 |
| 261 | ASCRP000475 |
| 262 | ASCRP000476 |
| 263 | ASCRP000478 |
| 264 | ASCRP000479 |
| 265 | ASCRP000480 |
| 266 | ASCRP000481 |
| 267 | ASCRP000483 |
| 268 | ASCRP000489 |
| 269 | ASCRP000493 |
| 270 | ASCRP000494 |
| 271 | ASCRP000496 |
| 272 | ASCRP000497 |
| 273 | ASCRP000498 |
| 274 | ASCRP000499 |
| 275 | ASCRP000500 |
| 276 | ASCRP000501 |
| 277 | ASCRP000502 |
| 278 | ASCRP000504 |
| 279 | ASCRP000505 |
| 280 | ASCRP000506 |
| 281 | ASCRP000507 |
| 282 | ASCRP000509 |
| 283 | ASCRP000510 |
| 284 | ASCRP000512 |
| 285 | ASCRP000513 |
| 286 | ASCRP000519 |
| 287 | ASCRP000521 |
| 288 | ASCRP000524 |
| 289 | ASCRP000525 |
| 290 | ASCRP000526 |
| 291 | ASCRP000529 |
| 292 | ASCRP000535 |
| 293 | ASCRP000536 |
| 294 | ASCRP000539 |
| 295 | ASCRP000540 |
| 296 | ASCRP000545 |
| 297 | ASCRP000546 |
| 298 | ASCRP000548 |
| 299 | ASCRP000549 |
| 300 | ASCRP000552 |

|     |             |
|-----|-------------|
| 301 | ASCRP000557 |
| 302 | ASCRP000561 |
| 303 | ASCRP000562 |
| 304 | ASCRP000564 |
| 305 | ASCRP000565 |
| 306 | ASCRP000566 |
| 307 | ASCRP000568 |
| 308 | ASCRP000569 |
| 309 | ASCRP000570 |
| 310 | ASCRP000574 |
| 311 | ASCRP000575 |
| 312 | ASCRP000577 |
| 313 | ASCRP000578 |
| 314 | ASCRP000580 |
| 315 | ASCRP000581 |
| 316 | ASCRP000584 |
| 317 | ASCRP000587 |
| 318 | ASCRP000591 |
| 319 | ASCRP000594 |
| 320 | ASCRP000595 |
| 321 | ASCRP000596 |
| 322 | ASCRP000597 |
| 323 | ASCRP000598 |
| 324 | ASCRP000599 |
| 325 | ASCRP000601 |
| 326 | ASCRP000603 |
| 327 | ASCRP000606 |
| 328 | ASCRP000607 |
| 329 | ASCRP000610 |
| 330 | ASCRP000611 |
| 331 | ASCRP000614 |
| 332 | ASCRP000615 |
| 333 | ASCRP000616 |
| 334 | ASCRP000617 |
| 335 | ASCRP000618 |
| 336 | ASCRP000620 |
| 337 | ASCRP000624 |
| 338 | ASCRP000625 |
| 339 | ASCRP000626 |
| 340 | ASCRP000627 |
| 341 | ASCRP000636 |
| 342 | ASCRP000639 |
| 343 | ASCRP000640 |



|     |             |
|-----|-------------|
| 344 | ASCRP000641 |
| 345 | ASCRP000643 |
| 346 | ASCRP000644 |
| 347 | ASCRP000645 |
| 348 | ASCRP000650 |
| 349 | ASCRP000654 |
| 350 | ASCRP000657 |
| 351 | ASCRP000658 |
| 352 | ASCRP000660 |
| 353 | ASCRP000661 |
| 354 | ASCRP000668 |
| 355 | ASCRP000669 |
| 356 | ASCRP000671 |
| 357 | ASCRP000678 |
| 358 | ASCRP000679 |
| 359 | ASCRP000680 |
| 360 | ASCRP000683 |
| 361 | ASCRP000684 |
| 362 | ASCRP000685 |
| 363 | ASCRP000686 |
| 364 | ASCRP000687 |
| 365 | ASCRP000689 |
| 366 | ASCRP000690 |
| 367 | ASCRP000693 |
| 368 | ASCRP000695 |
| 369 | ASCRP000706 |
| 370 | ASCRP000708 |
| 371 | ASCRP000709 |
| 372 | ASCRP000711 |
| 373 | ASCRP000712 |
| 374 | ASCRP000713 |
| 375 | ASCRP000714 |
| 376 | ASCRP000716 |
| 377 | ASCRP000717 |
| 378 | ASCRP000719 |
| 379 | ASCRP000721 |
| 380 | ASCRP000724 |
| 381 | ASCRP000727 |
| 382 | ASCRP000729 |
| 383 | ASCRP000732 |
| 384 | ASCRP000733 |
| 385 | ASCRP000734 |
| 386 | ASCRP000735 |

|     |             |
|-----|-------------|
| 387 | ASCRP000736 |
| 388 | ASCRP000737 |
| 389 | ASCRP000738 |
| 390 | ASCRP000741 |
| 391 | ASCRP000742 |
| 392 | ASCRP000745 |
| 393 | ASCRP000746 |
| 394 | ASCRP000750 |
| 395 | ASCRP000751 |
| 396 | ASCRP000752 |
| 397 | ASCRP000755 |
| 398 | ASCRP000756 |
| 399 | ASCRP000758 |
| 400 | ASCRP000759 |
| 401 | ASCRP000760 |
| 402 | ASCRP000767 |
| 403 | ASCRP000768 |
| 404 | ASCRP000769 |
| 405 | ASCRP000770 |
| 406 | ASCRP000772 |
| 407 | ASCRP000774 |
| 408 | ASCRP000775 |
| 409 | ASCRP000776 |
| 410 | ASCRP000779 |
| 411 | ASCRP000787 |
| 412 | ASCRP000788 |
| 413 | ASCRP000789 |
| 414 | ASCRP000791 |
| 415 | ASCRP000792 |
| 416 | ASCRP000793 |
| 417 | ASCRP000794 |
| 418 | ASCRP000795 |
| 419 | ASCRP000796 |
| 420 | ASCRP000799 |
| 421 | ASCRP000803 |
| 422 | ASCRP000804 |
| 423 | ASCRP000805 |
| 424 | ASCRP000807 |
| 425 | ASCRP000808 |
| 426 | ASCRP000810 |
| 427 | ASCRP000813 |
| 428 | ASCRP000816 |
| 429 | ASCRP000818 |

|     |             |
|-----|-------------|
| 430 | ASCRP000819 |
| 431 | ASCRP000821 |
| 432 | ASCRP000822 |
| 433 | ASCRP000823 |
| 434 | ASCRP000826 |
| 435 | ASCRP000828 |
| 436 | ASCRP000830 |
| 437 | ASCRP000832 |
| 438 | ASCRP000833 |
| 439 | ASCRP000836 |
| 440 | ASCRP000837 |
| 441 | ASCRP000844 |
| 442 | ASCRP000846 |
| 443 | ASCRP000847 |
| 444 | ASCRP000848 |
| 445 | ASCRP000849 |
| 446 | ASCRP000851 |
| 447 | ASCRP000852 |
| 448 | ASCRP000853 |
| 449 | ASCRP000854 |
| 450 | ASCRP000856 |
| 451 | ASCRP000859 |
| 452 | ASCRP000860 |
| 453 | ASCRP000861 |
| 454 | ASCRP000862 |
| 455 | ASCRP000866 |
| 456 | ASCRP000871 |
| 457 | ASCRP000876 |
| 458 | ASCRP000877 |
| 459 | ASCRP000880 |
| 460 | ASCRP000881 |
| 461 | ASCRP000885 |
| 462 | ASCRP000887 |
| 463 | ASCRP000889 |
| 464 | ASCRP000890 |
| 465 | ASCRP000892 |
| 466 | ASCRP000893 |
| 467 | ASCRP000899 |
| 468 | ASCRP000902 |
| 469 | ASCRP000906 |
| 470 | ASCRP000907 |
| 471 | ASCRP000909 |
| 472 | ASCRP000910 |

|     |             |
|-----|-------------|
| 473 | ASCRP000911 |
| 474 | ASCRP000912 |
| 475 | ASCRP000914 |
| 476 | ASCRP000915 |
| 477 | ASCRP000917 |
| 478 | ASCRP000921 |
| 479 | ASCRP000922 |
| 480 | ASCRP000924 |
| 481 | ASCRP000927 |
| 482 | ASCRP000929 |
| 483 | ASCRP000932 |
| 484 | ASCRP000933 |
| 485 | ASCRP000934 |
| 486 | ASCRP000942 |
| 487 | ASCRP000945 |
| 488 | ASCRP000946 |
| 489 | ASCRP000947 |
| 490 | ASCRP000949 |
| 491 | ASCRP000950 |
| 492 | ASCRP000952 |
| 493 | ASCRP000958 |
| 494 | ASCRP000959 |
| 495 | ASCRP000961 |
| 496 | ASCRP000964 |
| 497 | ASCRP000969 |
| 498 | ASCRP000975 |
| 499 | ASCRP000976 |
| 500 | ASCRP000979 |
| 501 | ASCRP000981 |
| 502 | ASCRP000984 |
| 503 | ASCRP000985 |
| 504 | ASCRP000986 |
| 505 | ASCRP000987 |
| 506 | ASCRP000988 |
| 507 | ASCRP000989 |
| 508 | ASCRP000990 |
| 509 | ASCRP000991 |
| 510 | ASCRP000994 |
| 511 | ASCRP000995 |
| 512 | ASCRP000997 |
| 513 | ASCRP000998 |
| 514 | ASCRP000999 |
| 515 | ASCRP001000 |

|     |             |
|-----|-------------|
| 516 | ASCRP001001 |
| 517 | ASCRP001003 |
| 518 | ASCRP001004 |
| 519 | ASCRP001007 |
| 520 | ASCRP001008 |
| 521 | ASCRP001009 |
| 522 | ASCRP001010 |
| 523 | ASCRP001011 |
| 524 | ASCRP001014 |
| 525 | ASCRP001015 |
| 526 | ASCRP001018 |
| 527 | ASCRP001020 |
| 528 | ASCRP001021 |
| 529 | ASCRP001024 |
| 530 | ASCRP001025 |
| 531 | ASCRP001029 |
| 532 | ASCRP001030 |
| 533 | ASCRP001031 |
| 534 | ASCRP001033 |
| 535 | ASCRP001034 |
| 536 | ASCRP001035 |
| 537 | ASCRP001038 |
| 538 | ASCRP001039 |
| 539 | ASCRP001041 |
| 540 | ASCRP001042 |
| 541 | ASCRP001044 |
| 542 | ASCRP001045 |
| 543 | ASCRP001046 |
| 544 | ASCRP001048 |
| 545 | ASCRP001049 |
| 546 | ASCRP001051 |
| 547 | ASCRP001052 |
| 548 | ASCRP001053 |
| 549 | ASCRP001058 |
| 550 | ASCRP001059 |
| 551 | ASCRP001061 |
| 552 | ASCRP001062 |
| 553 | ASCRP001065 |
| 554 | ASCRP001067 |
| 555 | ASCRP001068 |
| 556 | ASCRP001069 |
| 557 | ASCRP001070 |
| 558 | ASCRP001071 |

|     |             |
|-----|-------------|
| 559 | ASCRP001072 |
| 560 | ASCRP001074 |
| 561 | ASCRP001075 |
| 562 | ASCRP001076 |
| 563 | ASCRP001080 |
| 564 | ASCRP001081 |
| 565 | ASCRP001086 |
| 566 | ASCRP001087 |
| 567 | ASCRP001088 |
| 568 | ASCRP001092 |
| 569 | ASCRP001093 |
| 570 | ASCRP001094 |
| 571 | ASCRP001095 |
| 572 | ASCRP001097 |
| 573 | ASCRP001100 |
| 574 | ASCRP001106 |
| 575 | ASCRP001108 |
| 576 | ASCRP001109 |
| 577 | ASCRP001110 |
| 578 | ASCRP001114 |
| 579 | ASCRP001119 |
| 580 | ASCRP001122 |
| 581 | ASCRP001124 |
| 582 | ASCRP001125 |
| 583 | ASCRP001128 |
| 584 | ASCRP001129 |
| 585 | ASCRP001130 |
| 586 | ASCRP001131 |
| 587 | ASCRP001133 |
| 588 | ASCRP001135 |
| 589 | ASCRP001139 |
| 590 | ASCRP001141 |
| 591 | ASCRP001144 |
| 592 | ASCRP001146 |
| 593 | ASCRP001149 |
| 594 | ASCRP001161 |
| 595 | ASCRP001162 |
| 596 | ASCRP001164 |
| 597 | ASCRP001171 |
| 598 | ASCRP001174 |
| 599 | ASCRP001176 |
| 600 | ASCRP001179 |
| 601 | ASCRP001180 |

|     |             |
|-----|-------------|
| 602 | ASCRP001182 |
| 603 | ASCRP001183 |
| 604 | ASCRP001184 |
| 605 | ASCRP001189 |
| 606 | ASCRP001191 |
| 607 | ASCRP001192 |
| 608 | ASCRP001195 |
| 609 | ASCRP001196 |
| 610 | ASCRP001197 |
| 611 | ASCRP001198 |
| 612 | ASCRP001201 |
| 613 | ASCRP001203 |
| 614 | ASCRP001204 |
| 615 | ASCRP001206 |
| 616 | ASCRP001207 |
| 617 | ASCRP001209 |
| 618 | ASCRP001210 |
| 619 | ASCRP001213 |
| 620 | ASCRP001214 |
| 621 | ASCRP001216 |
| 622 | ASCRP001218 |
| 623 | ASCRP001219 |
| 624 | ASCRP001222 |
| 625 | ASCRP001223 |
| 626 | ASCRP001224 |
| 627 | ASCRP001225 |
| 628 | ASCRP001226 |
| 629 | ASCRP001227 |
| 630 | ASCRP001229 |
| 631 | ASCRP001234 |
| 632 | ASCRP001235 |
| 633 | ASCRP001236 |
| 634 | ASCRP001240 |
| 635 | ASCRP001241 |
| 636 | ASCRP001243 |
| 637 | ASCRP001245 |
| 638 | ASCRP001246 |
| 639 | ASCRP001247 |
| 640 | ASCRP001248 |
| 641 | ASCRP001249 |
| 642 | ASCRP001251 |
| 643 | ASCRP001252 |
| 644 | ASCRP001254 |

|     |             |
|-----|-------------|
| 645 | ASCRP001255 |
| 646 | ASCRP001256 |
| 647 | ASCRP001260 |
| 648 | ASCRP001263 |
| 649 | ASCRP001264 |
| 650 | ASCRP001265 |
| 651 | ASCRP001266 |
| 652 | ASCRP001268 |
| 653 | ASCRP001269 |
| 654 | ASCRP001277 |
| 655 | ASCRP001278 |
| 656 | ASCRP001279 |
| 657 | ASCRP001280 |
| 658 | ASCRP001281 |
| 659 | ASCRP001282 |
| 660 | ASCRP001283 |
| 661 | ASCRP001285 |
| 662 | ASCRP001289 |
| 663 | ASCRP001291 |
| 664 | ASCRP001292 |
| 665 | ASCRP001293 |
| 666 | ASCRP001296 |
| 667 | ASCRP001305 |
| 668 | ASCRP001306 |
| 669 | ASCRP001311 |
| 670 | ASCRP001312 |
| 671 | ASCRP001316 |
| 672 | ASCRP001317 |
| 673 | ASCRP001318 |
| 674 | ASCRP001322 |
| 675 | ASCRP001323 |
| 676 | ASCRP001328 |
| 677 | ASCRP001332 |
| 678 | ASCRP001333 |
| 679 | ASCRP001334 |
| 680 | ASCRP001336 |
| 681 | ASCRP001338 |
| 682 | ASCRP001340 |
| 683 | ASCRP001341 |
| 684 | ASCRP001342 |
| 685 | ASCRP001343 |
| 686 | ASCRP001348 |
| 687 | ASCRP001350 |



|     |             |
|-----|-------------|
| 688 | ASCRP001351 |
| 689 | ASCRP001352 |
| 690 | ASCRP001353 |
| 691 | ASCRP001355 |
| 692 | ASCRP001357 |
| 693 | ASCRP001358 |
| 694 | ASCRP001360 |
| 695 | ASCRP001365 |
| 696 | ASCRP001367 |
| 697 | ASCRP001368 |
| 698 | ASCRP001369 |
| 699 | ASCRP001370 |
| 700 | ASCRP001372 |
| 701 | ASCRP001373 |
| 702 | ASCRP001374 |
| 703 | ASCRP001375 |
| 704 | ASCRP001380 |
| 705 | ASCRP001381 |
| 706 | ASCRP001382 |
| 707 | ASCRP001383 |
| 708 | ASCRP001384 |
| 709 | ASCRP001385 |
| 710 | ASCRP001388 |
| 711 | ASCRP001392 |
| 712 | ASCRP001393 |
| 713 | ASCRP001395 |
| 714 | ASCRP001397 |
| 715 | ASCRP001399 |
| 716 | ASCRP001402 |
| 717 | ASCRP001404 |
| 718 | ASCRP001405 |
| 719 | ASCRP001407 |
| 720 | ASCRP001410 |
| 721 | ASCRP001413 |
| 722 | ASCRP001418 |
| 723 | ASCRP001419 |
| 724 | ASCRP001423 |
| 725 | ASCRP001425 |
| 726 | ASCRP001426 |
| 727 | ASCRP001428 |
| 728 | ASCRP001429 |
| 729 | ASCRP001430 |
| 730 | ASCRP001434 |

|     |             |
|-----|-------------|
| 731 | ASCRP001435 |
| 732 | ASCRP001440 |
| 733 | ASCRP001441 |
| 734 | ASCRP001443 |
| 735 | ASCRP001444 |
| 736 | ASCRP001445 |
| 737 | ASCRP001446 |
| 738 | ASCRP001456 |
| 739 | ASCRP001458 |
| 740 | ASCRP001460 |
| 741 | ASCRP001462 |
| 742 | ASCRP001466 |
| 743 | ASCRP001469 |
| 744 | ASCRP001473 |
| 745 | ASCRP001477 |
| 746 | ASCRP001480 |
| 747 | ASCRP001482 |
| 748 | ASCRP001484 |
| 749 | ASCRP001485 |
| 750 | ASCRP001492 |
| 751 | ASCRP001494 |
| 752 | ASCRP001502 |
| 753 | ASCRP001504 |
| 754 | ASCRP001505 |
| 755 | ASCRP001507 |
| 756 | ASCRP001508 |
| 757 | ASCRP001510 |
| 758 | ASCRP001511 |
| 759 | ASCRP001513 |
| 760 | ASCRP001517 |
| 761 | ASCRP001518 |
| 762 | ASCRP001519 |
| 763 | ASCRP001522 |
| 764 | ASCRP001523 |
| 765 | ASCRP001524 |
| 766 | ASCRP001527 |
| 767 | ASCRP001530 |
| 768 | ASCRP001533 |
| 769 | ASCRP001534 |
| 770 | ASCRP001537 |
| 771 | ASCRP001538 |
| 772 | ASCRP001539 |
| 773 | ASCRP001540 |

|     |             |
|-----|-------------|
| 774 | ASCRP001541 |
| 775 | ASCRP001542 |
| 776 | ASCRP001544 |
| 777 | ASCRP001545 |
| 778 | ASCRP001546 |
| 779 | ASCRP001547 |
| 780 | ASCRP001548 |
| 781 | ASCRP001550 |
| 782 | ASCRP001555 |
| 783 | ASCRP001564 |
| 784 | ASCRP001565 |
| 785 | ASCRP001567 |
| 786 | ASCRP001568 |
| 787 | ASCRP001569 |
| 788 | ASCRP001570 |
| 789 | ASCRP001575 |
| 790 | ASCRP001576 |
| 791 | ASCRP001577 |
| 792 | ASCRP001578 |
| 793 | ASCRP001582 |
| 794 | ASCRP001583 |
| 795 | ASCRP001584 |
| 796 | ASCRP001585 |
| 797 | ASCRP001586 |
| 798 | ASCRP001588 |
| 799 | ASCRP001589 |
| 800 | ASCRP001590 |
| 801 | ASCRP001592 |
| 802 | ASCRP001594 |
| 803 | ASCRP001596 |
| 804 | ASCRP001597 |
| 805 | ASCRP001603 |
| 806 | ASCRP001606 |
| 807 | ASCRP001609 |
| 808 | ASCRP001610 |
| 809 | ASCRP001611 |
| 810 | ASCRP001612 |
| 811 | ASCRP001614 |
| 812 | ASCRP001615 |
| 813 | ASCRP001616 |
| 814 | ASCRP001617 |
| 815 | ASCRP001618 |
| 816 | ASCRP001620 |

|     |             |
|-----|-------------|
| 817 | ASCRP001621 |
| 818 | ASCRP001626 |
| 819 | ASCRP001628 |
| 820 | ASCRP001629 |
| 821 | ASCRP001632 |
| 822 | ASCRP001633 |
| 823 | ASCRP001636 |
| 824 | ASCRP001639 |
| 825 | ASCRP001640 |
| 826 | ASCRP001643 |
| 827 | ASCRP001644 |
| 828 | ASCRP001645 |
| 829 | ASCRP001646 |
| 830 | ASCRP001647 |
| 831 | ASCRP001649 |
| 832 | ASCRP001650 |
| 833 | ASCRP001651 |
| 834 | ASCRP001653 |
| 835 | ASCRP001655 |
| 836 | ASCRP001656 |
| 837 | ASCRP001662 |
| 838 | ASCRP001664 |
| 839 | ASCRP001665 |
| 840 | ASCRP001666 |
| 841 | ASCRP001667 |
| 842 | ASCRP001668 |
| 843 | ASCRP001670 |
| 844 | ASCRP001671 |
| 845 | ASCRP001672 |
| 846 | ASCRP001674 |
| 847 | ASCRP001675 |
| 848 | ASCRP001677 |
| 849 | ASCRP001679 |
| 850 | ASCRP001681 |
| 851 | ASCRP001682 |
| 852 | ASCRP001687 |
| 853 | ASCRP001688 |
| 854 | ASCRP001690 |
| 855 | ASCRP001691 |
| 856 | ASCRP001693 |
| 857 | ASCRP001695 |
| 858 | ASCRP001697 |
| 859 | ASCRP001705 |

|     |             |
|-----|-------------|
| 860 | ASCRP001711 |
| 861 | ASCRP001712 |
| 862 | ASCRP001713 |
| 863 | ASCRP001714 |
| 864 | ASCRP001718 |
| 865 | ASCRP001724 |
| 866 | ASCRP001726 |
| 867 | ASCRP001727 |
| 868 | ASCRP001728 |
| 869 | ASCRP001729 |
| 870 | ASCRP001731 |
| 871 | ASCRP001732 |
| 872 | ASCRP001740 |
| 873 | ASCRP001743 |
| 874 | ASCRP001745 |
| 875 | ASCRP001746 |
| 876 | ASCRP001751 |
| 877 | ASCRP001754 |
| 878 | ASCRP001755 |
| 879 | ASCRP001758 |
| 880 | ASCRP001761 |
| 881 | ASCRP001763 |
| 882 | ASCRP001764 |
| 883 | ASCRP001766 |
| 884 | ASCRP001767 |
| 885 | ASCRP001769 |
| 886 | ASCRP001771 |
| 887 | ASCRP001772 |
| 888 | ASCRP001773 |
| 889 | ASCRP001778 |
| 890 | ASCRP001779 |
| 891 | ASCRP001784 |
| 892 | ASCRP001788 |
| 893 | ASCRP001790 |
| 894 | ASCRP001792 |
| 895 | ASCRP001793 |
| 896 | ASCRP001794 |
| 897 | ASCRP001796 |
| 898 | ASCRP001799 |
| 899 | ASCRP001800 |
| 900 | ASCRP001801 |
| 901 | ASCRP001805 |
| 902 | ASCRP001806 |

|     |             |
|-----|-------------|
| 903 | ASCRP001807 |
| 904 | ASCRP001808 |
| 905 | ASCRP001809 |
| 906 | ASCRP001810 |
| 907 | ASCRP001812 |
| 908 | ASCRP001815 |
| 909 | ASCRP001816 |
| 910 | ASCRP001817 |
| 911 | ASCRP001818 |
| 912 | ASCRP001820 |
| 913 | ASCRP001821 |
| 914 | ASCRP001822 |
| 915 | ASCRP001825 |
| 916 | ASCRP001826 |
| 917 | ASCRP001827 |
| 918 | ASCRP001829 |
| 919 | ASCRP001837 |
| 920 | ASCRP001841 |
| 921 | ASCRP001842 |
| 922 | ASCRP001843 |
| 923 | ASCRP001846 |
| 924 | ASCRP001852 |
| 925 | ASCRP001854 |
| 926 | ASCRP001855 |
| 927 | ASCRP001859 |
| 928 | ASCRP001860 |
| 929 | ASCRP001861 |
| 930 | ASCRP001862 |
| 931 | ASCRP001863 |
| 932 | ASCRP001868 |
| 933 | ASCRP001869 |
| 934 | ASCRP001872 |
| 935 | ASCRP001873 |
| 936 | ASCRP001875 |
| 937 | ASCRP001876 |
| 938 | ASCRP001878 |
| 939 | ASCRP001882 |
| 940 | ASCRP001886 |
| 941 | ASCRP001887 |
| 942 | ASCRP001888 |
| 943 | ASCRP001889 |
| 944 | ASCRP001892 |
| 945 | ASCRP001893 |

|     |             |
|-----|-------------|
| 946 | ASCRP001894 |
| 947 | ASCRP001895 |
| 948 | ASCRP001906 |
| 949 | ASCRP001907 |
| 950 | ASCRP001908 |
| 951 | ASCRP001909 |
| 952 | ASCRP001910 |
| 953 | ASCRP001911 |
| 954 | ASCRP001913 |
| 955 | ASCRP001914 |
| 956 | ASCRP001916 |
| 957 | ASCRP001922 |
| 958 | ASCRP001926 |
| 959 | ASCRP001929 |
| 960 | ASCRP001930 |
| 961 | ASCRP001931 |
| 962 | ASCRP001934 |
| 963 | ASCRP001936 |
| 964 | ASCRP001939 |
| 965 | ASCRP001940 |
| 966 | ASCRP001941 |
| 967 | ASCRP001942 |
| 968 | ASCRP001945 |
| 969 | ASCRP001946 |
| 970 | ASCRP001947 |
| 971 | ASCRP001949 |
| 972 | ASCRP001951 |
| 973 | ASCRP001953 |
| 974 | ASCRP001958 |
| 975 | ASCRP001959 |
| 976 | ASCRP001967 |
| 977 | ASCRP001972 |
| 978 | ASCRP001976 |
| 979 | ASCRP001979 |
| 980 | ASCRP001980 |
| 981 | ASCRP001981 |
| 982 | ASCRP001982 |
| 983 | ASCRP001983 |
| 984 | ASCRP001985 |
| 985 | ASCRP001988 |
| 986 | ASCRP001991 |
| 987 | ASCRP001992 |
| 988 | ASCRP001993 |

|      |             |
|------|-------------|
| 989  | ASCRP001994 |
| 990  | ASCRP001995 |
| 991  | ASCRP001996 |
| 992  | ASCRP001998 |
| 993  | ASCRP002000 |
| 994  | ASCRP002003 |
| 995  | ASCRP002004 |
| 996  | ASCRP002009 |
| 997  | ASCRP002010 |
| 998  | ASCRP002011 |
| 999  | ASCRP002017 |
| 1000 | ASCRP002019 |
| 1001 | ASCRP002021 |
| 1002 | ASCRP002022 |
| 1003 | ASCRP002025 |
| 1004 | ASCRP002029 |
| 1005 | ASCRP002030 |
| 1006 | ASCRP002035 |
| 1007 | ASCRP002036 |
| 1008 | ASCRP002039 |
| 1009 | ASCRP002040 |
| 1010 | ASCRP002042 |
| 1011 | ASCRP002044 |
| 1012 | ASCRP002045 |
| 1013 | ASCRP002046 |
| 1014 | ASCRP002050 |
| 1015 | ASCRP002051 |
| 1016 | ASCRP002052 |
| 1017 | ASCRP002053 |
| 1018 | ASCRP002054 |
| 1019 | ASCRP002055 |
| 1020 | ASCRP002056 |
| 1021 | ASCRP002058 |
| 1022 | ASCRP002059 |
| 1023 | ASCRP002061 |
| 1024 | ASCRP002062 |
| 1025 | ASCRP002064 |
| 1026 | ASCRP002065 |
| 1027 | ASCRP002068 |
| 1028 | ASCRP002069 |
| 1029 | ASCRP002072 |
| 1030 | ASCRP002075 |
| 1031 | ASCRP002076 |



|      |             |
|------|-------------|
| 1032 | ASCRP002083 |
| 1033 | ASCRP002084 |
| 1034 | ASCRP002086 |
| 1035 | ASCRP002087 |
| 1036 | ASCRP002088 |
| 1037 | ASCRP002090 |
| 1038 | ASCRP002092 |
| 1039 | ASCRP002094 |
| 1040 | ASCRP002095 |
| 1041 | ASCRP002099 |
| 1042 | ASCRP002100 |
| 1043 | ASCRP002101 |
| 1044 | ASCRP002102 |
| 1045 | ASCRP002104 |
| 1046 | ASCRP002105 |
| 1047 | ASCRP002106 |
| 1048 | ASCRP002108 |
| 1049 | ASCRP002111 |
| 1050 | ASCRP002112 |
| 1051 | ASCRP002113 |
| 1052 | ASCRP002114 |
| 1053 | ASCRP002117 |
| 1054 | ASCRP002119 |
| 1055 | ASCRP002121 |
| 1056 | ASCRP002123 |
| 1057 | ASCRP002124 |
| 1058 | ASCRP002125 |
| 1059 | ASCRP002126 |
| 1060 | ASCRP002128 |
| 1061 | ASCRP002130 |
| 1062 | ASCRP002131 |
| 1063 | ASCRP002133 |
| 1064 | ASCRP002134 |
| 1065 | ASCRP002135 |
| 1066 | ASCRP002136 |
| 1067 | ASCRP002139 |
| 1068 | ASCRP002140 |
| 1069 | ASCRP002141 |
| 1070 | ASCRP002143 |
| 1071 | ASCRP002145 |
| 1072 | ASCRP002147 |
| 1073 | ASCRP002155 |
| 1074 | ASCRP002158 |

|      |             |
|------|-------------|
| 1075 | ASCRP002160 |
| 1076 | ASCRP002161 |
| 1077 | ASCRP002165 |
| 1078 | ASCRP002170 |
| 1079 | ASCRP002171 |
| 1080 | ASCRP002174 |
| 1081 | ASCRP002176 |
| 1082 | ASCRP002178 |
| 1083 | ASCRP002179 |
| 1084 | ASCRP002182 |
| 1085 | ASCRP002183 |
| 1086 | ASCRP002184 |
| 1087 | ASCRP002185 |
| 1088 | ASCRP002189 |
| 1089 | ASCRP002191 |
| 1090 | ASCRP002192 |
| 1091 | ASCRP002193 |
| 1092 | ASCRP002194 |
| 1093 | ASCRP002195 |
| 1094 | ASCRP002196 |
| 1095 | ASCRP002198 |
| 1096 | ASCRP002200 |
| 1097 | ASCRP002204 |
| 1098 | ASCRP002205 |
| 1099 | ASCRP002206 |
| 1100 | ASCRP002208 |
| 1101 | ASCRP002209 |
| 1102 | ASCRP002210 |
| 1103 | ASCRP002211 |
| 1104 | ASCRP002214 |
| 1105 | ASCRP002215 |
| 1106 | ASCRP002217 |
| 1107 | ASCRP002219 |
| 1108 | ASCRP002221 |
| 1109 | ASCRP002222 |
| 1110 | ASCRP002223 |
| 1111 | ASCRP002224 |
| 1112 | ASCRP002227 |
| 1113 | ASCRP002228 |
| 1114 | ASCRP002229 |
| 1115 | ASCRP002230 |
| 1116 | ASCRP002231 |
| 1117 | ASCRP002233 |

|      |             |
|------|-------------|
| 1118 | ASCRP002235 |
| 1119 | ASCRP002237 |
| 1120 | ASCRP002238 |
| 1121 | ASCRP002239 |
| 1122 | ASCRP002242 |
| 1123 | ASCRP002243 |
| 1124 | ASCRP002244 |
| 1125 | ASCRP002246 |
| 1126 | ASCRP002247 |
| 1127 | ASCRP002248 |
| 1128 | ASCRP002249 |
| 1129 | ASCRP002250 |
| 1130 | ASCRP002252 |
| 1131 | ASCRP002253 |
| 1132 | ASCRP002256 |
| 1133 | ASCRP002257 |
| 1134 | ASCRP002259 |
| 1135 | ASCRP002260 |
| 1136 | ASCRP002261 |
| 1137 | ASCRP002262 |
| 1138 | ASCRP002263 |
| 1139 | ASCRP002264 |
| 1140 | ASCRP002265 |
| 1141 | ASCRP002266 |
| 1142 | ASCRP002267 |
| 1143 | ASCRP002268 |
| 1144 | ASCRP002270 |
| 1145 | ASCRP002273 |
| 1146 | ASCRP002274 |
| 1147 | ASCRP002276 |
| 1148 | ASCRP002277 |
| 1149 | ASCRP002279 |
| 1150 | ASCRP002284 |
| 1151 | ASCRP002285 |
| 1152 | ASCRP002286 |
| 1153 | ASCRP002288 |
| 1154 | ASCRP002289 |
| 1155 | ASCRP002290 |
| 1156 | ASCRP002292 |
| 1157 | ASCRP002293 |
| 1158 | ASCRP002294 |
| 1159 | ASCRP002297 |
| 1160 | ASCRP002298 |

|      |             |
|------|-------------|
| 1161 | ASCRP002301 |
| 1162 | ASCRP002303 |
| 1163 | ASCRP002304 |
| 1164 | ASCRP002305 |
| 1165 | ASCRP002306 |
| 1166 | ASCRP002307 |
| 1167 | ASCRP002308 |
| 1168 | ASCRP002309 |
| 1169 | ASCRP002311 |
| 1170 | ASCRP002315 |
| 1171 | ASCRP002316 |
| 1172 | ASCRP002318 |
| 1173 | ASCRP002324 |
| 1174 | ASCRP002325 |
| 1175 | ASCRP002326 |
| 1176 | ASCRP002329 |
| 1177 | ASCRP002331 |
| 1178 | ASCRP002332 |
| 1179 | ASCRP002335 |
| 1180 | ASCRP002336 |
| 1181 | ASCRP002339 |
| 1182 | ASCRP002340 |
| 1183 | ASCRP002342 |
| 1184 | ASCRP002344 |
| 1185 | ASCRP002345 |
| 1186 | ASCRP002346 |
| 1187 | ASCRP002347 |
| 1188 | ASCRP002348 |
| 1189 | ASCRP002350 |
| 1190 | ASCRP002351 |
| 1191 | ASCRP002354 |
| 1192 | ASCRP002356 |
| 1193 | ASCRP002365 |
| 1194 | ASCRP002366 |
| 1195 | ASCRP002368 |
| 1196 | ASCRP002369 |
| 1197 | ASCRP002373 |
| 1198 | ASCRP002374 |
| 1199 | ASCRP002375 |
| 1200 | ASCRP002376 |
| 1201 | ASCRP002378 |
| 1202 | ASCRP002380 |
| 1203 | ASCRP002381 |

|      |             |
|------|-------------|
| 1204 | ASCRP002385 |
| 1205 | ASCRP002386 |
| 1206 | ASCRP002389 |
| 1207 | ASCRP002390 |
| 1208 | ASCRP002394 |
| 1209 | ASCRP002396 |
| 1210 | ASCRP002397 |
| 1211 | ASCRP002398 |
| 1212 | ASCRP002400 |
| 1213 | ASCRP002401 |
| 1214 | ASCRP002404 |
| 1215 | ASCRP002405 |
| 1216 | ASCRP002407 |
| 1217 | ASCRP002408 |
| 1218 | ASCRP002412 |
| 1219 | ASCRP002414 |
| 1220 | ASCRP002415 |
| 1221 | ASCRP002417 |
| 1222 | ASCRP002418 |
| 1223 | ASCRP002420 |
| 1224 | ASCRP002422 |
| 1225 | ASCRP002423 |
| 1226 | ASCRP002424 |
| 1227 | ASCRP002426 |
| 1228 | ASCRP002427 |
| 1229 | ASCRP002428 |
| 1230 | ASCRP002429 |
| 1231 | ASCRP002431 |
| 1232 | ASCRP002434 |
| 1233 | ASCRP002435 |
| 1234 | ASCRP002438 |
| 1235 | ASCRP002446 |
| 1236 | ASCRP002448 |
| 1237 | ASCRP002450 |
| 1238 | ASCRP002451 |
| 1239 | ASCRP002452 |
| 1240 | ASCRP002453 |
| 1241 | ASCRP002454 |
| 1242 | ASCRP002456 |
| 1243 | ASCRP002458 |
| 1244 | ASCRP002460 |
| 1245 | ASCRP002462 |
| 1246 | ASCRP002463 |

|      |             |
|------|-------------|
| 1247 | ASCRP002465 |
| 1248 | ASCRP002466 |
| 1249 | ASCRP002469 |
| 1250 | ASCRP002470 |
| 1251 | ASCRP002471 |
| 1252 | ASCRP002472 |
| 1253 | ASCRP002478 |
| 1254 | ASCRP002480 |
| 1255 | ASCRP002485 |
| 1256 | ASCRP002486 |
| 1257 | ASCRP002487 |
| 1258 | ASCRP002489 |
| 1259 | ASCRP002490 |
| 1260 | ASCRP002492 |
| 1261 | ASCRP002493 |
| 1262 | ASCRP002497 |
| 1263 | ASCRP002499 |
| 1264 | ASCRP002503 |
| 1265 | ASCRP002505 |
| 1266 | ASCRP002507 |
| 1267 | ASCRP002508 |
| 1268 | ASCRP002509 |
| 1269 | ASCRP002517 |
| 1270 | ASCRP002518 |
| 1271 | ASCRP002519 |
| 1272 | ASCRP002523 |
| 1273 | ASCRP002524 |
| 1274 | ASCRP002529 |
| 1275 | ASCRP002530 |
| 1276 | ASCRP002533 |
| 1277 | ASCRP002534 |
| 1278 | ASCRP002536 |
| 1279 | ASCRP002537 |
| 1280 | ASCRP002538 |
| 1281 | ASCRP002539 |
| 1282 | ASCRP002540 |
| 1283 | ASCRP002541 |
| 1284 | ASCRP002542 |
| 1285 | ASCRP002544 |
| 1286 | ASCRP002545 |
| 1287 | ASCRP002546 |
| 1288 | ASCRP002547 |
| 1289 | ASCRP002548 |

|      |             |
|------|-------------|
| 1290 | ASCRP002552 |
| 1291 | ASCRP002553 |
| 1292 | ASCRP002554 |
| 1293 | ASCRP002555 |
| 1294 | ASCRP002556 |
| 1295 | ASCRP002557 |
| 1296 | ASCRP002558 |
| 1297 | ASCRP002560 |
| 1298 | ASCRP002561 |
| 1299 | ASCRP002562 |
| 1300 | ASCRP002564 |
| 1301 | ASCRP002565 |
| 1302 | ASCRP002566 |
| 1303 | ASCRP002568 |
| 1304 | ASCRP002569 |
| 1305 | ASCRP002571 |
| 1306 | ASCRP002573 |
| 1307 | ASCRP002576 |
| 1308 | ASCRP002579 |
| 1309 | ASCRP002582 |
| 1310 | ASCRP002585 |
| 1311 | ASCRP002591 |
| 1312 | ASCRP002592 |
| 1313 | ASCRP002593 |
| 1314 | ASCRP002594 |
| 1315 | ASCRP002595 |
| 1316 | ASCRP002596 |
| 1317 | ASCRP002597 |
| 1318 | ASCRP002598 |
| 1319 | ASCRP002599 |
| 1320 | ASCRP002600 |
| 1321 | ASCRP002601 |
| 1322 | ASCRP002602 |
| 1323 | ASCRP002603 |
| 1324 | ASCRP002605 |
| 1325 | ASCRP002606 |
| 1326 | ASCRP002608 |
| 1327 | ASCRP002609 |
| 1328 | ASCRP002610 |
| 1329 | ASCRP002611 |
| 1330 | ASCRP002614 |
| 1331 | ASCRP002615 |
| 1332 | ASCRP002616 |

|      |             |
|------|-------------|
| 1333 | ASCRP002618 |
| 1334 | ASCRP002619 |
| 1335 | ASCRP002620 |
| 1336 | ASCRP002623 |
| 1337 | ASCRP002628 |
| 1338 | ASCRP002632 |
| 1339 | ASCRP002633 |
| 1340 | ASCRP002636 |
| 1341 | ASCRP002639 |
| 1342 | ASCRP002641 |
| 1343 | ASCRP002642 |
| 1344 | ASCRP002643 |
| 1345 | ASCRP002644 |
| 1346 | ASCRP002647 |
| 1347 | ASCRP002648 |
| 1348 | ASCRP002650 |
| 1349 | ASCRP002651 |
| 1350 | ASCRP002652 |
| 1351 | ASCRP002653 |
| 1352 | ASCRP002662 |
| 1353 | ASCRP002664 |
| 1354 | ASCRP002665 |
| 1355 | ASCRP002667 |
| 1356 | ASCRP002669 |
| 1357 | ASCRP002671 |
| 1358 | ASCRP002673 |
| 1359 | ASCRP002678 |
| 1360 | ASCRP002680 |
| 1361 | ASCRP002681 |
| 1362 | ASCRP002683 |
| 1363 | ASCRP002686 |
| 1364 | ASCRP002688 |
| 1365 | ASCRP002690 |
| 1366 | ASCRP002693 |
| 1367 | ASCRP002694 |
| 1368 | ASCRP002695 |
| 1369 | ASCRP002696 |
| 1370 | ASCRP002697 |
| 1371 | ASCRP002698 |
| 1372 | ASCRP002699 |
| 1373 | ASCRP002700 |
| 1374 | ASCRP002701 |
| 1375 | ASCRP002702 |



|      |             |
|------|-------------|
| 1376 | ASCRP002703 |
| 1377 | ASCRP002704 |
| 1378 | ASCRP002705 |
| 1379 | ASCRP002709 |
| 1380 | ASCRP002711 |
| 1381 | ASCRP002712 |
| 1382 | ASCRP002714 |
| 1383 | ASCRP002715 |
| 1384 | ASCRP002716 |
| 1385 | ASCRP002717 |
| 1386 | ASCRP002718 |
| 1387 | ASCRP002719 |
| 1388 | ASCRP002722 |
| 1389 | ASCRP002723 |
| 1390 | ASCRP002729 |
| 1391 | ASCRP002730 |
| 1392 | ASCRP002732 |
| 1393 | ASCRP002733 |
| 1394 | ASCRP002734 |
| 1395 | ASCRP002735 |
| 1396 | ASCRP002736 |
| 1397 | ASCRP002738 |
| 1398 | ASCRP002740 |
| 1399 | ASCRP002741 |
| 1400 | ASCRP002742 |
| 1401 | ASCRP002743 |
| 1402 | ASCRP002746 |
| 1403 | ASCRP002747 |
| 1404 | ASCRP002748 |
| 1405 | ASCRP002749 |
| 1406 | ASCRP002750 |
| 1407 | ASCRP002751 |
| 1408 | ASCRP002752 |
| 1409 | ASCRP002753 |
| 1410 | ASCRP002755 |
| 1411 | ASCRP002757 |
| 1412 | ASCRP002758 |
| 1413 | ASCRP002759 |
| 1414 | ASCRP002760 |
| 1415 | ASCRP002761 |
| 1416 | ASCRP002764 |
| 1417 | ASCRP002765 |
| 1418 | ASCRP002767 |

|      |             |
|------|-------------|
| 1419 | ASCRP002768 |
| 1420 | ASCRP002769 |
| 1421 | ASCRP002770 |
| 1422 | ASCRP002771 |
| 1423 | ASCRP002773 |
| 1424 | ASCRP002774 |
| 1425 | ASCRP002775 |
| 1426 | ASCRP002776 |
| 1427 | ASCRP002779 |
| 1428 | ASCRP002780 |
| 1429 | ASCRP002782 |
| 1430 | ASCRP002783 |
| 1431 | ASCRP002784 |
| 1432 | ASCRP002786 |
| 1433 | ASCRP002787 |
| 1434 | ASCRP002788 |
| 1435 | ASCRP002790 |
| 1436 | ASCRP002792 |
| 1437 | ASCRP002795 |
| 1438 | ASCRP002796 |
| 1439 | ASCRP002797 |
| 1440 | ASCRP002799 |
| 1441 | ASCRP002800 |
| 1442 | ASCRP002801 |
| 1443 | ASCRP002802 |
| 1444 | ASCRP002803 |
| 1445 | ASCRP002804 |
| 1446 | ASCRP002807 |
| 1447 | ASCRP002808 |
| 1448 | ASCRP002809 |
| 1449 | ASCRP002811 |
| 1450 | ASCRP002813 |
| 1451 | ASCRP002818 |
| 1452 | ASCRP002819 |
| 1453 | ASCRP002820 |
| 1454 | ASCRP002823 |
| 1455 | ASCRP002827 |
| 1456 | ASCRP002834 |
| 1457 | ASCRP002839 |
| 1458 | ASCRP002840 |
| 1459 | ASCRP002841 |
| 1460 | ASCRP002844 |
| 1461 | ASCRP002846 |

|      |             |
|------|-------------|
| 1462 | ASCRP002847 |
| 1463 | ASCRP002848 |
| 1464 | ASCRP002849 |
| 1465 | ASCRP002851 |
| 1466 | ASCRP002853 |
| 1467 | ASCRP002854 |
| 1468 | ASCRP002856 |
| 1469 | ASCRP002857 |
| 1470 | ASCRP002858 |
| 1471 | ASCRP002859 |
| 1472 | ASCRP002860 |
| 1473 | ASCRP002863 |
| 1474 | ASCRP002864 |
| 1475 | ASCRP002867 |
| 1476 | ASCRP002872 |
| 1477 | ASCRP002873 |
| 1478 | ASCRP002875 |
| 1479 | ASCRP002876 |
| 1480 | ASCRP002877 |
| 1481 | ASCRP002878 |
| 1482 | ASCRP002880 |
| 1483 | ASCRP002883 |
| 1484 | ASCRP002884 |
| 1485 | ASCRP002887 |
| 1486 | ASCRP002888 |
| 1487 | ASCRP002889 |
| 1488 | ASCRP002891 |
| 1489 | ASCRP002892 |
| 1490 | ASCRP002893 |
| 1491 | ASCRP002894 |
| 1492 | ASCRP002896 |
| 1493 | ASCRP002897 |
| 1494 | ASCRP002898 |
| 1495 | ASCRP002899 |
| 1496 | ASCRP002900 |
| 1497 | ASCRP002902 |
| 1498 | ASCRP002904 |
| 1499 | ASCRP002905 |
| 1500 | ASCRP002910 |
| 1501 | ASCRP002911 |
| 1502 | ASCRP002912 |
| 1503 | ASCRP002913 |
| 1504 | ASCRP002914 |

|      |             |
|------|-------------|
| 1505 | ASCRP002915 |
| 1506 | ASCRP002916 |
| 1507 | ASCRP002918 |
| 1508 | ASCRP002926 |
| 1509 | ASCRP002927 |
| 1510 | ASCRP002928 |
| 1511 | ASCRP002929 |
| 1512 | ASCRP002931 |
| 1513 | ASCRP002932 |
| 1514 | ASCRP002934 |
| 1515 | ASCRP002936 |
| 1516 | ASCRP002937 |
| 1517 | ASCRP002938 |
| 1518 | ASCRP002939 |
| 1519 | ASCRP002941 |
| 1520 | ASCRP002942 |
| 1521 | ASCRP002944 |
| 1522 | ASCRP002952 |
| 1523 | ASCRP002954 |
| 1524 | ASCRP002957 |
| 1525 | ASCRP002958 |
| 1526 | ASCRP002959 |
| 1527 | ASCRP002960 |
| 1528 | ASCRP002961 |
| 1529 | ASCRP002962 |
| 1530 | ASCRP002964 |
| 1531 | ASCRP002965 |
| 1532 | ASCRP002969 |
| 1533 | ASCRP002973 |
| 1534 | ASCRP002974 |
| 1535 | ASCRP002986 |
| 1536 | ASCRP002992 |
| 1537 | ASCRP002993 |
| 1538 | ASCRP002994 |
| 1539 | ASCRP002995 |
| 1540 | ASCRP002997 |
| 1541 | ASCRP002998 |
| 1542 | ASCRP002999 |
| 1543 | ASCRP003000 |
| 1544 | ASCRP003001 |
| 1545 | ASCRP003002 |
| 1546 | ASCRP003006 |
| 1547 | ASCRP003011 |

|      |             |
|------|-------------|
| 1548 | ASCRP003013 |
| 1549 | ASCRP003014 |
| 1550 | ASCRP003017 |
| 1551 | ASCRP003019 |
| 1552 | ASCRP003026 |
| 1553 | ASCRP003027 |
| 1554 | ASCRP003031 |
| 1555 | ASCRP003032 |
| 1556 | ASCRP003033 |
| 1557 | ASCRP003035 |
| 1558 | ASCRP003036 |
| 1559 | ASCRP003037 |
| 1560 | ASCRP003038 |
| 1561 | ASCRP003040 |
| 1562 | ASCRP003043 |
| 1563 | ASCRP003046 |
| 1564 | ASCRP003052 |
| 1565 | ASCRP003053 |
| 1566 | ASCRP003057 |
| 1567 | ASCRP003058 |
| 1568 | ASCRP003059 |
| 1569 | ASCRP003062 |
| 1570 | ASCRP003066 |
| 1571 | ASCRP003067 |
| 1572 | ASCRP003071 |
| 1573 | ASCRP003074 |
| 1574 | ASCRP003075 |
| 1575 | ASCRP003076 |
| 1576 | ASCRP003077 |
| 1577 | ASCRP003078 |
| 1578 | ASCRP003081 |
| 1579 | ASCRP003082 |
| 1580 | ASCRP003085 |
| 1581 | ASCRP003088 |
| 1582 | ASCRP003089 |
| 1583 | ASCRP003092 |
| 1584 | ASCRP003094 |
| 1585 | ASCRP003097 |
| 1586 | ASCRP003104 |
| 1587 | ASCRP003105 |
| 1588 | ASCRP003107 |
| 1589 | ASCRP003108 |
| 1590 | ASCRP003113 |

|      |             |
|------|-------------|
| 1591 | ASCRP003114 |
| 1592 | ASCRP003116 |
| 1593 | ASCRP003117 |
| 1594 | ASCRP003118 |
| 1595 | ASCRP003119 |
| 1596 | ASCRP003121 |
| 1597 | ASCRP003124 |
| 1598 | ASCRP003125 |
| 1599 | ASCRP003126 |
| 1600 | ASCRP003129 |
| 1601 | ASCRP003130 |
| 1602 | ASCRP003133 |
| 1603 | ASCRP003136 |
| 1604 | ASCRP003137 |
| 1605 | ASCRP003141 |
| 1606 | ASCRP003146 |
| 1607 | ASCRP003147 |
| 1608 | ASCRP003148 |
| 1609 | ASCRP003152 |
| 1610 | ASCRP003153 |
| 1611 | ASCRP003157 |
| 1612 | ASCRP003158 |
| 1613 | ASCRP003166 |
| 1614 | ASCRP003170 |
| 1615 | ASCRP003171 |
| 1616 | ASCRP003181 |
| 1617 | ASCRP003182 |
| 1618 | ASCRP003185 |
| 1619 | ASCRP003187 |
| 1620 | ASCRP003189 |
| 1621 | ASCRP003190 |
| 1622 | ASCRP003193 |
| 1623 | ASCRP003194 |
| 1624 | ASCRP003196 |
| 1625 | ASCRP003197 |
| 1626 | ASCRP003198 |
| 1627 | ASCRP003201 |
| 1628 | ASCRP003202 |
| 1629 | ASCRP003203 |
| 1630 | ASCRP003204 |
| 1631 | ASCRP003205 |
| 1632 | ASCRP003206 |
| 1633 | ASCRP003207 |

|      |             |
|------|-------------|
| 1634 | ASCRP003209 |
| 1635 | ASCRP003210 |
| 1636 | ASCRP003212 |
| 1637 | ASCRP003216 |
| 1638 | ASCRP003218 |
| 1639 | ASCRP003220 |
| 1640 | ASCRP003221 |
| 1641 | ASCRP003222 |
| 1642 | ASCRP003223 |
| 1643 | ASCRP003224 |
| 1644 | ASCRP003225 |
| 1645 | ASCRP003226 |
| 1646 | ASCRP003227 |
| 1647 | ASCRP003230 |
| 1648 | ASCRP003231 |
| 1649 | ASCRP003232 |
| 1650 | ASCRP003235 |
| 1651 | ASCRP003236 |
| 1652 | ASCRP003241 |
| 1653 | ASCRP003244 |
| 1654 | ASCRP003245 |
| 1655 | ASCRP003250 |
| 1656 | ASCRP003252 |
| 1657 | ASCRP003255 |
| 1658 | ASCRP003256 |
| 1659 | ASCRP003257 |
| 1660 | ASCRP003258 |
| 1661 | ASCRP003259 |
| 1662 | ASCRP003261 |
| 1663 | ASCRP003262 |
| 1664 | ASCRP003263 |
| 1665 | ASCRP003265 |
| 1666 | ASCRP003266 |
| 1667 | ASCRP003268 |
| 1668 | ASCRP003273 |
| 1669 | ASCRP003276 |
| 1670 | ASCRP003277 |
| 1671 | ASCRP003278 |
| 1672 | ASCRP003279 |
| 1673 | ASCRP003282 |
| 1674 | ASCRP003283 |
| 1675 | ASCRP003284 |
| 1676 | ASCRP003285 |

|      |             |
|------|-------------|
| 1677 | ASCRP003286 |
| 1678 | ASCRP003287 |
| 1679 | ASCRP003290 |
| 1680 | ASCRP003291 |
| 1681 | ASCRP003294 |
| 1682 | ASCRP003295 |
| 1683 | ASCRP003296 |
| 1684 | ASCRP003297 |
| 1685 | ASCRP003298 |
| 1686 | ASCRP003305 |
| 1687 | ASCRP003306 |
| 1688 | ASCRP003308 |
| 1689 | ASCRP003317 |
| 1690 | ASCRP003318 |
| 1691 | ASCRP003319 |
| 1692 | ASCRP003320 |
| 1693 | ASCRP003321 |
| 1694 | ASCRP003323 |
| 1695 | ASCRP003324 |
| 1696 | ASCRP003325 |
| 1697 | ASCRP003327 |
| 1698 | ASCRP003329 |
| 1699 | ASCRP003331 |
| 1700 | ASCRP003334 |
| 1701 | ASCRP003335 |
| 1702 | ASCRP003338 |
| 1703 | ASCRP003339 |
| 1704 | ASCRP003341 |
| 1705 | ASCRP003342 |
| 1706 | ASCRP003343 |
| 1707 | ASCRP003344 |
| 1708 | ASCRP003345 |
| 1709 | ASCRP003346 |
| 1710 | ASCRP003353 |
| 1711 | ASCRP003355 |
| 1712 | ASCRP003357 |
| 1713 | ASCRP003358 |
| 1714 | ASCRP003359 |
| 1715 | ASCRP003361 |
| 1716 | ASCRP003364 |
| 1717 | ASCRP003365 |
| 1718 | ASCRP003369 |
| 1719 | ASCRP003370 |



|      |             |
|------|-------------|
| 1720 | ASCRP003371 |
| 1721 | ASCRP003376 |
| 1722 | ASCRP003377 |
| 1723 | ASCRP003379 |
| 1724 | ASCRP003380 |
| 1725 | ASCRP003381 |
| 1726 | ASCRP003384 |
| 1727 | ASCRP003385 |
| 1728 | ASCRP003387 |
| 1729 | ASCRP003388 |
| 1730 | ASCRP003389 |
| 1731 | ASCRP003390 |
| 1732 | ASCRP003392 |
| 1733 | ASCRP003393 |
| 1734 | ASCRP003394 |
| 1735 | ASCRP003395 |
| 1736 | ASCRP003396 |
| 1737 | ASCRP003397 |
| 1738 | ASCRP003405 |
| 1739 | ASCRP003406 |
| 1740 | ASCRP003407 |
| 1741 | ASCRP003408 |
| 1742 | ASCRP003409 |
| 1743 | ASCRP003412 |
| 1744 | ASCRP003423 |
| 1745 | ASCRP003424 |
| 1746 | ASCRP003426 |
| 1747 | ASCRP003427 |
| 1748 | ASCRP003430 |
| 1749 | ASCRP003434 |
| 1750 | ASCRP003437 |
| 1751 | ASCRP003438 |
| 1752 | ASCRP003439 |
| 1753 | ASCRP003440 |
| 1754 | ASCRP003441 |
| 1755 | ASCRP003442 |
| 1756 | ASCRP003444 |
| 1757 | ASCRP003446 |
| 1758 | ASCRP003450 |
| 1759 | ASCRP003454 |
| 1760 | ASCRP003455 |
| 1761 | ASCRP003458 |
| 1762 | ASCRP003460 |

|      |             |
|------|-------------|
| 1763 | ASCRP003461 |
| 1764 | ASCRP003462 |
| 1765 | ASCRP003463 |
| 1766 | ASCRP003465 |
| 1767 | ASCRP003466 |
| 1768 | ASCRP003467 |
| 1769 | ASCRP003468 |
| 1770 | ASCRP003469 |
| 1771 | ASCRP003470 |
| 1772 | ASCRP003472 |
| 1773 | ASCRP003473 |
| 1774 | ASCRP003474 |
| 1775 | ASCRP003476 |
| 1776 | ASCRP003477 |
| 1777 | ASCRP003485 |
| 1778 | ASCRP003486 |
| 1779 | ASCRP003487 |
| 1780 | ASCRP003489 |
| 1781 | ASCRP003491 |
| 1782 | ASCRP003492 |
| 1783 | ASCRP003496 |
| 1784 | ASCRP003497 |
| 1785 | ASCRP003507 |
| 1786 | ASCRP003508 |
| 1787 | ASCRP003509 |
| 1788 | ASCRP003511 |
| 1789 | ASCRP003513 |
| 1790 | ASCRP003515 |
| 1791 | ASCRP003516 |
| 1792 | ASCRP003517 |
| 1793 | ASCRP003518 |
| 1794 | ASCRP003523 |
| 1795 | ASCRP003524 |
| 1796 | ASCRP003534 |
| 1797 | ASCRP003535 |
| 1798 | ASCRP003536 |
| 1799 | ASCRP003537 |
| 1800 | ASCRP003538 |
| 1801 | ASCRP003539 |
| 1802 | ASCRP003544 |
| 1803 | ASCRP003546 |
| 1804 | ASCRP003548 |
| 1805 | ASCRP003549 |

|      |             |
|------|-------------|
| 1806 | ASCRP003550 |
| 1807 | ASCRP003553 |
| 1808 | ASCRP003555 |
| 1809 | ASCRP003556 |
| 1810 | ASCRP003557 |
| 1811 | ASCRP003559 |
| 1812 | ASCRP003560 |
| 1813 | ASCRP003562 |
| 1814 | ASCRP003563 |
| 1815 | ASCRP003564 |
| 1816 | ASCRP003565 |
| 1817 | ASCRP003567 |
| 1818 | ASCRP003568 |
| 1819 | ASCRP003569 |
| 1820 | ASCRP003571 |
| 1821 | ASCRP003574 |
| 1822 | ASCRP003577 |
| 1823 | ASCRP003579 |
| 1824 | ASCRP003582 |
| 1825 | ASCRP003583 |
| 1826 | ASCRP003585 |
| 1827 | ASCRP003588 |
| 1828 | ASCRP003590 |
| 1829 | ASCRP003591 |
| 1830 | ASCRP003595 |
| 1831 | ASCRP003597 |
| 1832 | ASCRP003598 |
| 1833 | ASCRP003605 |
| 1834 | ASCRP003606 |
| 1835 | ASCRP003607 |
| 1836 | ASCRP003609 |
| 1837 | ASCRP003613 |
| 1838 | ASCRP003614 |
| 1839 | ASCRP003615 |
| 1840 | ASCRP003619 |
| 1841 | ASCRP003620 |
| 1842 | ASCRP003623 |
| 1843 | ASCRP003625 |
| 1844 | ASCRP003626 |
| 1845 | ASCRP003627 |
| 1846 | ASCRP003636 |
| 1847 | ASCRP003637 |
| 1848 | ASCRP003640 |

|      |             |
|------|-------------|
| 1849 | ASCRP003643 |
| 1850 | ASCRP003645 |
| 1851 | ASCRP003646 |
| 1852 | ASCRP003647 |
| 1853 | ASCRP003648 |
| 1854 | ASCRP003649 |
| 1855 | ASCRP003650 |
| 1856 | ASCRP003651 |
| 1857 | ASCRP003652 |
| 1858 | ASCRP003653 |
| 1859 | ASCRP003654 |
| 1860 | ASCRP003656 |
| 1861 | ASCRP003658 |
| 1862 | ASCRP003659 |
| 1863 | ASCRP003661 |
| 1864 | ASCRP003663 |
| 1865 | ASCRP003665 |
| 1866 | ASCRP003668 |
| 1867 | ASCRP003669 |
| 1868 | ASCRP003676 |
| 1869 | ASCRP003677 |
| 1870 | ASCRP003678 |
| 1871 | ASCRP003681 |
| 1872 | ASCRP003682 |
| 1873 | ASCRP003683 |
| 1874 | ASCRP003685 |
| 1875 | ASCRP003686 |
| 1876 | ASCRP003687 |
| 1877 | ASCRP003688 |
| 1878 | ASCRP003689 |
| 1879 | ASCRP003696 |
| 1880 | ASCRP003698 |
| 1881 | ASCRP003699 |
| 1882 | ASCRP003701 |
| 1883 | ASCRP003703 |
| 1884 | ASCRP003704 |
| 1885 | ASCRP003706 |
| 1886 | ASCRP003708 |
| 1887 | ASCRP003709 |
| 1888 | ASCRP003711 |
| 1889 | ASCRP003712 |
| 1890 | ASCRP003713 |
| 1891 | ASCRP003714 |

|      |             |
|------|-------------|
| 1892 | ASCRP003715 |
| 1893 | ASCRP003717 |
| 1894 | ASCRP003720 |
| 1895 | ASCRP003722 |
| 1896 | ASCRP003724 |
| 1897 | ASCRP003726 |
| 1898 | ASCRP003727 |
| 1899 | ASCRP003739 |
| 1900 | ASCRP003740 |
| 1901 | ASCRP003741 |
| 1902 | ASCRP003742 |
| 1903 | ASCRP003743 |
| 1904 | ASCRP003745 |
| 1905 | ASCRP003746 |
| 1906 | ASCRP003748 |
| 1907 | ASCRP003752 |
| 1908 | ASCRP003754 |
| 1909 | ASCRP003755 |
| 1910 | ASCRP003759 |
| 1911 | ASCRP003766 |
| 1912 | ASCRP003768 |
| 1913 | ASCRP003769 |
| 1914 | ASCRP003770 |
| 1915 | ASCRP003776 |
| 1916 | ASCRP003777 |
| 1917 | ASCRP003779 |
| 1918 | ASCRP003781 |
| 1919 | ASCRP003782 |
| 1920 | ASCRP003784 |
| 1921 | ASCRP003786 |
| 1922 | ASCRP003788 |
| 1923 | ASCRP003789 |
| 1924 | ASCRP003790 |
| 1925 | ASCRP003792 |
| 1926 | ASCRP003793 |
| 1927 | ASCRP003795 |
| 1928 | ASCRP003796 |
| 1929 | ASCRP003802 |
| 1930 | ASCRP003804 |
| 1931 | ASCRP003806 |
| 1932 | ASCRP003808 |
| 1933 | ASCRP003809 |
| 1934 | ASCRP003811 |

|      |             |
|------|-------------|
| 1935 | ASCRP003816 |
| 1936 | ASCRP003817 |
| 1937 | ASCRP003820 |
| 1938 | ASCRP003821 |
| 1939 | ASCRP003822 |
| 1940 | ASCRP003824 |
| 1941 | ASCRP003825 |
| 1942 | ASCRP003827 |
| 1943 | ASCRP003829 |
| 1944 | ASCRP003831 |
| 1945 | ASCRP003838 |
| 1946 | ASCRP003839 |
| 1947 | ASCRP003844 |
| 1948 | ASCRP003845 |
| 1949 | ASCRP003846 |
| 1950 | ASCRP003847 |
| 1951 | ASCRP003849 |
| 1952 | ASCRP003851 |
| 1953 | ASCRP003852 |
| 1954 | ASCRP003853 |
| 1955 | ASCRP003854 |
| 1956 | ASCRP003855 |
| 1957 | ASCRP003856 |
| 1958 | ASCRP003857 |
| 1959 | ASCRP003858 |
| 1960 | ASCRP003859 |
| 1961 | ASCRP003860 |
| 1962 | ASCRP003861 |
| 1963 | ASCRP003862 |
| 1964 | ASCRP003863 |
| 1965 | ASCRP003867 |
| 1966 | ASCRP003870 |
| 1967 | ASCRP003871 |
| 1968 | ASCRP003872 |
| 1969 | ASCRP003875 |
| 1970 | ASCRP003876 |
| 1971 | ASCRP003882 |
| 1972 | ASCRP003884 |
| 1973 | ASCRP003889 |
| 1974 | ASCRP003890 |
| 1975 | ASCRP003891 |
| 1976 | ASCRP003892 |
| 1977 | ASCRP003893 |

|      |             |
|------|-------------|
| 1978 | ASCRP003895 |
| 1979 | ASCRP003897 |
| 1980 | ASCRP003899 |
| 1981 | ASCRP003900 |
| 1982 | ASCRP003902 |
| 1983 | ASCRP003903 |
| 1984 | ASCRP003904 |
| 1985 | ASCRP003906 |
| 1986 | ASCRP003907 |
| 1987 | ASCRP003909 |
| 1988 | ASCRP003910 |
| 1989 | ASCRP003912 |
| 1990 | ASCRP003922 |
| 1991 | ASCRP003925 |
| 1992 | ASCRP003929 |
| 1993 | ASCRP003931 |
| 1994 | ASCRP003932 |
| 1995 | ASCRP003933 |
| 1996 | ASCRP003935 |
| 1997 | ASCRP003937 |
| 1998 | ASCRP003938 |
| 1999 | ASCRP003939 |
| 2000 | ASCRP003940 |
| 2001 | ASCRP003941 |
| 2002 | ASCRP003942 |
| 2003 | ASCRP003943 |
| 2004 | ASCRP003944 |
| 2005 | ASCRP003946 |
| 2006 | ASCRP003949 |
| 2007 | ASCRP003951 |
| 2008 | ASCRP003959 |
| 2009 | ASCRP003960 |
| 2010 | ASCRP003962 |
| 2011 | ASCRP003963 |
| 2012 | ASCRP003964 |
| 2013 | ASCRP003965 |
| 2014 | ASCRP003966 |
| 2015 | ASCRP003967 |
| 2016 | ASCRP003968 |
| 2017 | ASCRP003969 |
| 2018 | ASCRP003970 |
| 2019 | ASCRP003971 |
| 2020 | ASCRP003973 |

|      |             |
|------|-------------|
| 2021 | ASCRP003977 |
| 2022 | ASCRP003978 |
| 2023 | ASCRP003980 |
| 2024 | ASCRP003981 |
| 2025 | ASCRP003982 |
| 2026 | ASCRP003983 |
| 2027 | ASCRP003985 |
| 2028 | ASCRP003987 |
| 2029 | ASCRP003989 |
| 2030 | ASCRP003990 |
| 2031 | ASCRP003994 |
| 2032 | ASCRP003999 |
| 2033 | ASCRP004000 |
| 2034 | ASCRP004002 |
| 2035 | ASCRP004003 |
| 2036 | ASCRP004004 |
| 2037 | ASCRP004005 |
| 2038 | ASCRP004009 |
| 2039 | ASCRP004014 |
| 2040 | ASCRP004018 |
| 2041 | ASCRP004021 |
| 2042 | ASCRP004022 |
| 2043 | ASCRP004026 |
| 2044 | ASCRP004027 |
| 2045 | ASCRP004028 |
| 2046 | ASCRP004029 |
| 2047 | ASCRP004035 |
| 2048 | ASCRP004038 |
| 2049 | ASCRP004039 |
| 2050 | ASCRP004040 |
| 2051 | ASCRP004041 |
| 2052 | ASCRP004042 |
| 2053 | ASCRP004044 |
| 2054 | ASCRP004048 |
| 2055 | ASCRP004050 |
| 2056 | ASCRP004051 |
| 2057 | ASCRP004053 |
| 2058 | ASCRP004060 |
| 2059 | ASCRP004061 |
| 2060 | ASCRP004062 |
| 2061 | ASCRP004063 |
| 2062 | ASCRP004066 |
| 2063 | ASCRP004067 |



|      |             |
|------|-------------|
| 2064 | ASCRP004071 |
| 2065 | ASCRP004072 |
| 2066 | ASCRP004073 |
| 2067 | ASCRP004074 |
| 2068 | ASCRP004079 |
| 2069 | ASCRP004081 |
| 2070 | ASCRP004084 |
| 2071 | ASCRP004088 |
| 2072 | ASCRP004091 |
| 2073 | ASCRP004093 |
| 2074 | ASCRP004094 |
| 2075 | ASCRP004095 |
| 2076 | ASCRP004096 |
| 2077 | ASCRP004098 |
| 2078 | ASCRP004100 |
| 2079 | ASCRP004102 |
| 2080 | ASCRP004103 |
| 2081 | ASCRP004107 |
| 2082 | ASCRP004108 |
| 2083 | ASCRP004115 |
| 2084 | ASCRP004116 |
| 2085 | ASCRP004120 |
| 2086 | ASCRP004123 |
| 2087 | ASCRP004124 |
| 2088 | ASCRP004128 |
| 2089 | ASCRP004132 |
| 2090 | ASCRP004135 |
| 2091 | ASCRP004136 |
| 2092 | ASCRP004139 |
| 2093 | ASCRP004141 |
| 2094 | ASCRP004144 |
| 2095 | ASCRP004147 |
| 2096 | ASCRP004150 |
| 2097 | ASCRP004151 |
| 2098 | ASCRP004161 |
| 2099 | ASCRP004162 |
| 2100 | ASCRP004164 |
| 2101 | ASCRP004165 |
| 2102 | ASCRP004166 |
| 2103 | ASCRP004167 |
| 2104 | ASCRP004170 |
| 2105 | ASCRP004171 |
| 2106 | ASCRP004172 |

|      |             |
|------|-------------|
| 2107 | ASCRP004173 |
| 2108 | ASCRP004176 |
| 2109 | ASCRP004178 |
| 2110 | ASCRP004179 |
| 2111 | ASCRP004181 |
| 2112 | ASCRP004182 |
| 2113 | ASCRP004183 |
| 2114 | ASCRP004184 |
| 2115 | ASCRP004185 |
| 2116 | ASCRP004186 |
| 2117 | ASCRP004196 |
| 2118 | ASCRP004198 |
| 2119 | ASCRP004199 |
| 2120 | ASCRP004200 |
| 2121 | ASCRP004203 |
| 2122 | ASCRP004207 |
| 2123 | ASCRP004208 |
| 2124 | ASCRP004209 |
| 2125 | ASCRP004211 |
| 2126 | ASCRP004213 |
| 2127 | ASCRP004215 |
| 2128 | ASCRP004217 |
| 2129 | ASCRP004219 |
| 2130 | ASCRP004221 |
| 2131 | ASCRP004222 |
| 2132 | ASCRP004224 |
| 2133 | ASCRP004226 |
| 2134 | ASCRP004227 |
| 2135 | ASCRP004228 |
| 2136 | ASCRP004230 |
| 2137 | ASCRP004231 |
| 2138 | ASCRP004232 |
| 2139 | ASCRP004233 |
| 2140 | ASCRP004246 |
| 2141 | ASCRP004247 |
| 2142 | ASCRP004248 |
| 2143 | ASCRP004251 |
| 2144 | ASCRP004253 |
| 2145 | ASCRP004254 |
| 2146 | ASCRP004255 |
| 2147 | ASCRP004262 |
| 2148 | ASCRP004264 |
| 2149 | ASCRP004265 |

|      |             |
|------|-------------|
| 2150 | ASCRP004266 |
| 2151 | ASCRP004268 |
| 2152 | ASCRP004270 |
| 2153 | ASCRP004272 |
| 2154 | ASCRP004274 |
| 2155 | ASCRP004277 |
| 2156 | ASCRP004278 |
| 2157 | ASCRP004279 |
| 2158 | ASCRP004283 |
| 2159 | ASCRP004284 |
| 2160 | ASCRP004285 |
| 2161 | ASCRP004286 |
| 2162 | ASCRP004287 |
| 2163 | ASCRP004290 |
| 2164 | ASCRP004292 |
| 2165 | ASCRP004294 |
| 2166 | ASCRP004296 |
| 2167 | ASCRP004297 |
| 2168 | ASCRP004299 |
| 2169 | ASCRP004301 |
| 2170 | ASCRP004306 |
| 2171 | ASCRP004307 |
| 2172 | ASCRP004309 |
| 2173 | ASCRP004310 |
| 2174 | ASCRP004311 |
| 2175 | ASCRP004314 |
| 2176 | ASCRP004315 |
| 2177 | ASCRP004316 |
| 2178 | ASCRP004318 |
| 2179 | ASCRP004319 |
| 2180 | ASCRP004320 |
| 2181 | ASCRP004321 |
| 2182 | ASCRP004322 |
| 2183 | ASCRP004324 |
| 2184 | ASCRP004329 |
| 2185 | ASCRP004332 |
| 2186 | ASCRP004336 |
| 2187 | ASCRP004338 |
| 2188 | ASCRP004341 |
| 2189 | ASCRP004344 |
| 2190 | ASCRP004346 |
| 2191 | ASCRP004349 |
| 2192 | ASCRP004350 |

|      |             |
|------|-------------|
| 2193 | ASCRP004351 |
| 2194 | ASCRP004352 |
| 2195 | ASCRP004354 |
| 2196 | ASCRP004355 |
| 2197 | ASCRP004358 |
| 2198 | ASCRP004360 |
| 2199 | ASCRP004361 |
| 2200 | ASCRP004363 |
| 2201 | ASCRP004365 |
| 2202 | ASCRP004367 |
| 2203 | ASCRP004368 |
| 2204 | ASCRP004369 |
| 2205 | ASCRP004372 |
| 2206 | ASCRP004375 |
| 2207 | ASCRP004376 |
| 2208 | ASCRP004377 |
| 2209 | ASCRP004379 |
| 2210 | ASCRP004380 |
| 2211 | ASCRP004381 |
| 2212 | ASCRP004382 |
| 2213 | ASCRP004383 |
| 2214 | ASCRP004384 |
| 2215 | ASCRP004387 |
| 2216 | ASCRP004390 |
| 2217 | ASCRP004391 |
| 2218 | ASCRP004393 |
| 2219 | ASCRP004394 |
| 2220 | ASCRP004399 |
| 2221 | ASCRP004400 |
| 2222 | ASCRP004403 |
| 2223 | ASCRP004404 |
| 2224 | ASCRP004406 |
| 2225 | ASCRP004407 |
| 2226 | ASCRP004408 |
| 2227 | ASCRP004411 |
| 2228 | ASCRP004412 |
| 2229 | ASCRP004413 |
| 2230 | ASCRP004419 |
| 2231 | ASCRP004420 |
| 2232 | ASCRP004421 |
| 2233 | ASCRP004422 |
| 2234 | ASCRP004423 |
| 2235 | ASCRP004424 |

|      |             |
|------|-------------|
| 2236 | ASCRP004425 |
| 2237 | ASCRP004426 |
| 2238 | ASCRP004427 |
| 2239 | ASCRP004429 |
| 2240 | ASCRP004430 |
| 2241 | ASCRP004431 |
| 2242 | ASCRP004434 |
| 2243 | ASCRP004438 |
| 2244 | ASCRP004439 |
| 2245 | ASCRP004441 |
| 2246 | ASCRP004442 |
| 2247 | ASCRP004443 |
| 2248 | ASCRP004454 |
| 2249 | ASCRP004465 |
| 2250 | ASCRP004466 |
| 2251 | ASCRP004467 |
| 2252 | ASCRP004471 |
| 2253 | ASCRP004473 |
| 2254 | ASCRP004476 |
| 2255 | ASCRP004477 |
| 2256 | ASCRP004478 |
| 2257 | ASCRP004480 |
| 2258 | ASCRP004481 |
| 2259 | ASCRP004482 |
| 2260 | ASCRP004483 |
| 2261 | ASCRP004484 |
| 2262 | ASCRP004485 |
| 2263 | ASCRP004486 |
| 2264 | ASCRP004487 |
| 2265 | ASCRP004488 |
| 2266 | ASCRP004489 |
| 2267 | ASCRP004490 |
| 2268 | ASCRP004491 |
| 2269 | ASCRP004492 |
| 2270 | ASCRP004493 |
| 2271 | ASCRP004495 |
| 2272 | ASCRP004498 |
| 2273 | ASCRP004499 |
| 2274 | ASCRP004502 |
| 2275 | ASCRP004503 |
| 2276 | ASCRP004504 |
| 2277 | ASCRP004507 |
| 2278 | ASCRP004508 |

|      |             |
|------|-------------|
| 2279 | ASCRP004510 |
| 2280 | ASCRP004513 |
| 2281 | ASCRP004514 |
| 2282 | ASCRP004515 |
| 2283 | ASCRP004517 |
| 2284 | ASCRP004521 |
| 2285 | ASCRP004522 |
| 2286 | ASCRP004526 |
| 2287 | ASCRP004527 |
| 2288 | ASCRP004529 |
| 2289 | ASCRP004530 |
| 2290 | ASCRP004531 |
| 2291 | ASCRP004532 |
| 2292 | ASCRP004534 |
| 2293 | ASCRP004535 |
| 2294 | ASCRP004536 |
| 2295 | ASCRP004538 |
| 2296 | ASCRP004539 |
| 2297 | ASCRP004540 |
| 2298 | ASCRP004546 |
| 2299 | ASCRP004547 |
| 2300 | ASCRP004548 |
| 2301 | ASCRP004550 |
| 2302 | ASCRP004553 |
| 2303 | ASCRP004560 |
| 2304 | ASCRP004569 |
| 2305 | ASCRP004571 |
| 2306 | ASCRP004572 |
| 2307 | ASCRP004573 |
| 2308 | ASCRP004574 |
| 2309 | ASCRP004575 |
| 2310 | ASCRP004576 |
| 2311 | ASCRP004577 |
| 2312 | ASCRP004578 |
| 2313 | ASCRP004582 |
| 2314 | ASCRP004586 |
| 2315 | ASCRP004588 |
| 2316 | ASCRP004594 |
| 2317 | ASCRP004595 |
| 2318 | ASCRP004596 |
| 2319 | ASCRP004599 |
| 2320 | ASCRP004602 |
| 2321 | ASCRP004604 |

|      |             |
|------|-------------|
| 2322 | ASCRP004605 |
| 2323 | ASCRP004613 |
| 2324 | ASCRP004615 |
| 2325 | ASCRP004616 |
| 2326 | ASCRP004617 |
| 2327 | ASCRP004618 |
| 2328 | ASCRP004619 |
| 2329 | ASCRP004621 |
| 2330 | ASCRP004623 |
| 2331 | ASCRP004627 |
| 2332 | ASCRP004630 |
| 2333 | ASCRP004634 |
| 2334 | ASCRP004636 |
| 2335 | ASCRP004639 |
| 2336 | ASCRP004640 |
| 2337 | ASCRP004641 |
| 2338 | ASCRP004642 |
| 2339 | ASCRP004643 |
| 2340 | ASCRP004647 |
| 2341 | ASCRP004653 |
| 2342 | ASCRP004655 |
| 2343 | ASCRP004657 |
| 2344 | ASCRP004658 |
| 2345 | ASCRP004660 |
| 2346 | ASCRP004661 |
| 2347 | ASCRP004664 |
| 2348 | ASCRP004665 |
| 2349 | ASCRP004667 |
| 2350 | ASCRP004668 |
| 2351 | ASCRP004669 |
| 2352 | ASCRP004670 |
| 2353 | ASCRP004671 |
| 2354 | ASCRP004674 |
| 2355 | ASCRP004679 |
| 2356 | ASCRP004680 |
| 2357 | ASCRP004682 |
| 2358 | ASCRP004684 |
| 2359 | ASCRP004685 |
| 2360 | ASCRP004686 |
| 2361 | ASCRP004689 |
| 2362 | ASCRP004690 |
| 2363 | ASCRP004691 |
| 2364 | ASCRP004693 |

|      |             |
|------|-------------|
| 2365 | ASCRP004694 |
| 2366 | ASCRP004695 |
| 2367 | ASCRP004696 |
| 2368 | ASCRP004701 |
| 2369 | ASCRP004704 |
| 2370 | ASCRP004705 |
| 2371 | ASCRP004710 |
| 2372 | ASCRP004711 |
| 2373 | ASCRP004714 |
| 2374 | ASCRP004720 |
| 2375 | ASCRP004721 |
| 2376 | ASCRP004722 |
| 2377 | ASCRP004723 |
| 2378 | ASCRP004724 |
| 2379 | ASCRP004725 |
| 2380 | ASCRP004728 |
| 2381 | ASCRP004729 |
| 2382 | ASCRP004730 |
| 2383 | ASCRP004731 |
| 2384 | ASCRP004732 |
| 2385 | ASCRP004735 |
| 2386 | ASCRP004736 |
| 2387 | ASCRP004739 |
| 2388 | ASCRP004741 |
| 2389 | ASCRP004742 |
| 2390 | ASCRP004749 |
| 2391 | ASCRP004751 |
| 2392 | ASCRP004752 |
| 2393 | ASCRP004753 |
| 2394 | ASCRP004757 |
| 2395 | ASCRP004760 |
| 2396 | ASCRP004762 |
| 2397 | ASCRP004764 |
| 2398 | ASCRP004766 |
| 2399 | ASCRP004767 |
| 2400 | ASCRP004768 |
| 2401 | ASCRP004769 |
| 2402 | ASCRP004772 |
| 2403 | ASCRP004773 |
| 2404 | ASCRP004774 |
| 2405 | ASCRP004775 |
| 2406 | ASCRP004779 |
| 2407 | ASCRP004780 |



|      |             |
|------|-------------|
| 2408 | ASCRP004781 |
| 2409 | ASCRP004788 |
| 2410 | ASCRP004789 |
| 2411 | ASCRP004790 |
| 2412 | ASCRP004791 |
| 2413 | ASCRP004793 |
| 2414 | ASCRP004794 |
| 2415 | ASCRP004795 |
| 2416 | ASCRP004797 |
| 2417 | ASCRP004801 |
| 2418 | ASCRP004803 |
| 2419 | ASCRP004805 |
| 2420 | ASCRP004806 |
| 2421 | ASCRP004808 |
| 2422 | ASCRP004812 |
| 2423 | ASCRP004813 |
| 2424 | ASCRP004814 |
| 2425 | ASCRP004819 |
| 2426 | ASCRP004820 |
| 2427 | ASCRP004821 |
| 2428 | ASCRP004822 |
| 2429 | ASCRP004825 |
| 2430 | ASCRP004827 |
| 2431 | ASCRP004828 |
| 2432 | ASCRP004830 |
| 2433 | ASCRP004834 |
| 2434 | ASCRP004835 |
| 2435 | ASCRP004836 |
| 2436 | ASCRP004837 |
| 2437 | ASCRP004839 |
| 2438 | ASCRP004842 |
| 2439 | ASCRP004843 |
| 2440 | ASCRP004846 |
| 2441 | ASCRP004848 |
| 2442 | ASCRP004851 |
| 2443 | ASCRP004852 |
| 2444 | ASCRP004853 |
| 2445 | ASCRP004861 |
| 2446 | ASCRP004869 |
| 2447 | ASCRP004871 |
| 2448 | ASCRP004872 |
| 2449 | ASCRP004873 |
| 2450 | ASCRP004874 |

|      |             |
|------|-------------|
| 2451 | ASCRP004878 |
| 2452 | ASCRP004883 |
| 2453 | ASCRP004885 |
| 2454 | ASCRP004888 |
| 2455 | ASCRP004893 |
| 2456 | ASCRP004894 |
| 2457 | ASCRP004897 |
| 2458 | ASCRP004902 |
| 2459 | ASCRP004903 |
| 2460 | ASCRP004905 |
| 2461 | ASCRP004906 |
| 2462 | ASCRP004908 |
| 2463 | ASCRP004909 |
| 2464 | ASCRP004910 |
| 2465 | ASCRP004913 |
| 2466 | ASCRP004914 |
| 2467 | ASCRP004918 |
| 2468 | ASCRP004919 |
| 2469 | ASCRP004920 |
| 2470 | ASCRP004922 |
| 2471 | ASCRP004928 |
| 2472 | ASCRP004930 |
| 2473 | ASCRP004931 |
| 2474 | ASCRP004935 |
| 2475 | ASCRP004940 |
| 2476 | ASCRP004942 |
| 2477 | ASCRP004946 |
| 2478 | ASCRP004947 |
| 2479 | ASCRP004949 |
| 2480 | ASCRP004950 |
| 2481 | ASCRP004952 |
| 2482 | ASCRP004953 |
| 2483 | ASCRP004954 |
| 2484 | ASCRP004955 |
| 2485 | ASCRP004958 |
| 2486 | ASCRP004962 |
| 2487 | ASCRP004967 |
| 2488 | ASCRP004969 |
| 2489 | ASCRP004970 |
| 2490 | ASCRP004971 |
| 2491 | ASCRP004977 |
| 2492 | ASCRP004978 |
| 2493 | ASCRP004979 |

|      |             |
|------|-------------|
| 2494 | ASCRP004980 |
| 2495 | ASCRP004986 |
| 2496 | ASCRP004991 |
| 2497 | ASCRP004994 |
| 2498 | ASCRP004995 |
| 2499 | ASCRP004997 |
| 2500 | ASCRP005002 |
| 2501 | ASCRP005003 |
| 2502 | ASCRP005005 |
| 2503 | ASCRP005006 |
| 2504 | ASCRP005008 |
| 2505 | ASCRP005009 |
| 2506 | ASCRP005010 |
| 2507 | ASCRP005011 |
| 2508 | ASCRP005012 |
| 2509 | ASCRP005013 |
| 2510 | ASCRP005019 |
| 2511 | ASCRP005021 |
| 2512 | ASCRP005023 |
| 2513 | ASCRP005030 |
| 2514 | ASCRP005031 |
| 2515 | ASCRP005035 |
| 2516 | ASCRP005037 |
| 2517 | ASCRP005039 |
| 2518 | ASCRP005040 |
| 2519 | ASCRP005041 |
| 2520 | ASCRP005043 |
| 2521 | ASCRP005045 |
| 2522 | ASCRP005046 |
| 2523 | ASCRP005047 |
| 2524 | ASCRP005048 |
| 2525 | ASCRP005049 |
| 2526 | ASCRP005050 |
| 2527 | ASCRP005052 |
| 2528 | ASCRP005056 |
| 2529 | ASCRP005062 |
| 2530 | ASCRP005063 |
| 2531 | ASCRP005064 |
| 2532 | ASCRP005065 |
| 2533 | ASCRP005066 |
| 2534 | ASCRP005068 |
| 2535 | ASCRP005069 |
| 2536 | ASCRP005070 |

|      |             |
|------|-------------|
| 2537 | ASCRP005072 |
| 2538 | ASCRP005073 |
| 2539 | ASCRP005075 |
| 2540 | ASCRP005076 |
| 2541 | ASCRP005077 |
| 2542 | ASCRP005078 |
| 2543 | ASCRP005081 |
| 2544 | ASCRP005084 |
| 2545 | ASCRP005085 |
| 2546 | ASCRP005086 |
| 2547 | ASCRP005087 |
| 2548 | ASCRP005088 |
| 2549 | ASCRP005089 |
| 2550 | ASCRP005096 |
| 2551 | ASCRP005099 |
| 2552 | ASCRP005101 |
| 2553 | ASCRP005102 |
| 2554 | ASCRP005103 |
| 2555 | ASCRP005105 |
| 2556 | ASCRP005106 |
| 2557 | ASCRP005108 |
| 2558 | ASCRP005111 |
| 2559 | ASCRP005112 |
| 2560 | ASCRP005113 |
| 2561 | ASCRP005114 |
| 2562 | ASCRP005117 |
| 2563 | ASCRP005119 |
| 2564 | ASCRP005120 |
| 2565 | ASCRP005123 |
| 2566 | ASCRP005124 |
| 2567 | ASCRP005125 |
| 2568 | ASCRP005127 |
| 2569 | ASCRP005128 |
| 2570 | ASCRP005129 |
| 2571 | ASCRP005132 |
| 2572 | ASCRP005134 |
| 2573 | ASCRP005136 |
| 2574 | ASCRP005141 |
| 2575 | ASCRP005142 |
| 2576 | ASCRP005143 |
| 2577 | ASCRP005146 |
| 2578 | ASCRP005149 |
| 2579 | ASCRP005151 |

|      |             |
|------|-------------|
| 2580 | ASCRP005154 |
| 2581 | ASCRP005161 |
| 2582 | ASCRP005162 |
| 2583 | ASCRP005163 |
| 2584 | ASCRP005164 |
| 2585 | ASCRP005167 |
| 2586 | ASCRP005169 |
| 2587 | ASCRP005170 |
| 2588 | ASCRP005171 |
| 2589 | ASCRP005174 |
| 2590 | ASCRP005175 |
| 2591 | ASCRP005176 |
| 2592 | ASCRP005177 |
| 2593 | ASCRP005178 |
| 2594 | ASCRP005179 |
| 2595 | ASCRP005181 |
| 2596 | ASCRP005182 |
| 2597 | ASCRP005183 |
| 2598 | ASCRP005184 |
| 2599 | ASCRP005186 |
| 2600 | ASCRP005187 |
| 2601 | ASCRP005189 |
| 2602 | ASCRP005190 |
| 2603 | ASCRP005191 |
| 2604 | ASCRP005194 |
| 2605 | ASCRP005197 |
| 2606 | ASCRP005198 |
| 2607 | ASCRP005199 |
| 2608 | ASCRP005200 |
| 2609 | ASCRP005201 |
| 2610 | ASCRP005203 |
| 2611 | ASCRP005206 |
| 2612 | ASCRP005210 |
| 2613 | ASCRP005211 |
| 2614 | ASCRP005213 |
| 2615 | ASCRP005216 |
| 2616 | ASCRP005217 |
| 2617 | ASCRP005218 |
| 2618 | ASCRP005219 |
| 2619 | ASCRP005220 |
| 2620 | ASCRP005221 |
| 2621 | ASCRP005222 |
| 2622 | ASCRP005223 |

|      |             |
|------|-------------|
| 2623 | ASCRP005226 |
| 2624 | ASCRP005230 |
| 2625 | ASCRP005234 |
| 2626 | ASCRP005235 |
| 2627 | ASCRP005240 |
| 2628 | ASCRP005242 |
| 2629 | ASCRP005243 |
| 2630 | ASCRP005244 |
| 2631 | ASCRP005247 |
| 2632 | ASCRP005249 |
| 2633 | ASCRP005251 |
| 2634 | ASCRP005254 |
| 2635 | ASCRP005260 |
| 2636 | ASCRP005263 |
| 2637 | ASCRP005264 |
| 2638 | ASCRP005268 |
| 2639 | ASCRP005270 |
| 2640 | ASCRP005271 |
| 2641 | ASCRP005272 |
| 2642 | ASCRP005273 |
| 2643 | ASCRP005274 |
| 2644 | ASCRP005276 |
| 2645 | ASCRP005277 |
| 2646 | ASCRP005278 |
| 2647 | ASCRP005282 |
| 2648 | ASCRP005283 |
| 2649 | ASCRP005284 |
| 2650 | ASCRP005288 |
| 2651 | ASCRP005296 |
| 2652 | ASCRP005297 |
| 2653 | ASCRP005300 |
| 2654 | ASCRP005301 |
| 2655 | ASCRP005302 |
| 2656 | ASCRP005303 |
| 2657 | ASCRP005304 |
| 2658 | ASCRP005305 |
| 2659 | ASCRP005306 |
| 2660 | ASCRP005307 |
| 2661 | ASCRP005308 |
| 2662 | ASCRP005311 |
| 2663 | ASCRP005315 |
| 2664 | ASCRP005316 |
| 2665 | ASCRP005317 |

|      |             |
|------|-------------|
| 2666 | ASCRP005318 |
| 2667 | ASCRP005319 |
| 2668 | ASCRP005320 |
| 2669 | ASCRP005321 |
| 2670 | ASCRP005322 |
| 2671 | ASCRP005323 |
| 2672 | ASCRP005324 |
| 2673 | ASCRP005325 |
| 2674 | ASCRP005326 |
| 2675 | ASCRP005327 |
| 2676 | ASCRP005329 |
| 2677 | ASCRP005330 |
| 2678 | ASCRP005332 |
| 2679 | ASCRP005333 |
| 2680 | ASCRP005336 |
| 2681 | ASCRP005339 |
| 2682 | ASCRP005340 |
| 2683 | ASCRP005341 |
| 2684 | ASCRP005342 |
| 2685 | ASCRP005343 |
| 2686 | ASCRP005344 |
| 2687 | ASCRP005345 |
| 2688 | ASCRP005346 |
| 2689 | ASCRP005350 |
| 2690 | ASCRP005351 |
| 2691 | ASCRP005353 |
| 2692 | ASCRP005355 |
| 2693 | ASCRP005356 |
| 2694 | ASCRP005357 |
| 2695 | ASCRP005358 |
| 2696 | ASCRP005359 |
| 2697 | ASCRP005360 |
| 2698 | ASCRP005361 |
| 2699 | ASCRP005362 |
| 2700 | ASCRP005363 |
| 2701 | ASCRP005364 |
| 2702 | ASCRP005365 |
| 2703 | ASCRP005366 |
| 2704 | ASCRP005367 |
| 2705 | ASCRP005368 |
| 2706 | ASCRP005369 |
| 2707 | ASCRP005370 |
| 2708 | ASCRP005373 |

|      |             |
|------|-------------|
| 2709 | ASCRP005374 |
| 2710 | ASCRP005376 |
| 2711 | ASCRP005377 |
| 2712 | ASCRP005380 |
| 2713 | ASCRP005381 |
| 2714 | ASCRP005382 |
| 2715 | ASCRP005383 |
| 2716 | ASCRP005384 |
| 2717 | ASCRP005385 |
| 2718 | ASCRP005386 |
| 2719 | ASCRP005388 |
| 2720 | ASCRP005390 |
| 2721 | ASCRP005392 |
| 2722 | ASCRP005393 |
| 2723 | ASCRP005394 |
| 2724 | ASCRP005395 |
| 2725 | ASCRP005396 |
| 2726 | ASCRP005397 |
