# Supplementary material for: [Retracted] Transcriptional Profiling Uncovers Biologically Significant RNAs and Regulatory Networks in Nucleus Pulposus from Intervertebral Disc Degeneration Patients
Source: Hindawi journal article supplement (doi:10.1155/2021/6696335), 2021-01-01
Supplement: f7 [file 6696335.f7.pdf]

|    | Genes  |
|----|--------|
| 1  | 10306  |
| 2  | 10919  |
| 3  | 10923  |
| 4  | 10943  |
| 5  | 10964  |
| 6  | 10990  |
| 7  | 10991  |
| 8  | 11005  |
| 9  | 11024  |
| 10 | 11038  |
| 11 | 11044  |
| 12 | 11045  |
| 13 | 11111  |
| 14 | 11121  |
| 15 | 11125  |
| 16 | 11139  |
| 17 | 11140  |
| 18 | 11141  |
| 19 | 11142  |
| 20 | 11144  |
| 21 | 11177  |
| 22 | 11182  |
| 23 | 11226  |
| 24 | 11229  |
| 25 | 11235  |
| 26 | 11249  |
| 27 | 11254  |
| 28 | 11255  |
| 29 | 11279  |
| 30 | 13132  |
| 31 | 13367  |
| 32 | 13371  |
| 33 | 13421  |
| 34 | 13485  |
| 35 | 13784  |
| 36 | 14258  |
| 37 | 14288  |
| 38 | 14290  |
| 39 | 14294  |
| 40 | 14301  |
| 41 | 14316  |
| 42 | 145647 |

|    |        |
|----|--------|
| 43 | 145657 |
| 44 | 145659 |
| 45 | 145690 |
| 46 | 145705 |
| 47 | 145716 |
| 48 | 145717 |
| 49 | 145736 |
| 50 | 145740 |
| 51 | 145745 |
| 52 | 145753 |
| 53 | 145758 |
| 54 | 145760 |
| 55 | 145768 |
| 56 | 145769 |
| 57 | 145820 |
| 58 | 145838 |
| 59 | 145840 |
| 60 | 145843 |
| 61 | 145901 |
| 62 | 145905 |
| 63 | 145934 |
| 64 | 145984 |
| 65 | 145990 |
| 66 | 145991 |
| 67 | 145992 |
| 68 | 145996 |
| 69 | 145998 |
| 70 | 146002 |
| 71 | 146011 |
| 72 | 146016 |
| 73 | 146021 |
| 74 | 146023 |
| 75 | 146027 |
| 76 | 146044 |
| 77 | 146050 |
| 78 | 146051 |
| 79 | 146053 |
| 80 | 146058 |
| 81 | 146060 |
| 82 | 146065 |
| 83 | 146080 |
| 84 | 146085 |
| 85 | 146087 |

|     |        |
|-----|--------|
| 86  | 146092 |
| 87  | 146103 |
| 88  | 146110 |
| 89  | 146114 |
| 90  | 146120 |
| 91  | 146123 |
| 92  | 146131 |
| 93  | 146146 |
| 94  | 146147 |
| 95  | 146154 |
| 96  | 146175 |
| 97  | 146176 |
| 98  | 146179 |
| 99  | 146182 |
| 100 | 146185 |
| 101 | 146188 |
| 102 | 146189 |
| 103 | 146196 |
| 104 | 146197 |
| 105 | 146210 |
| 106 | 146218 |
| 107 | 147203 |
| 108 | 147280 |
| 109 | 147283 |
| 110 | 147334 |
| 111 | 147360 |
| 112 | 147366 |
| 113 | 147389 |
| 114 | 147493 |
| 115 | 147558 |
| 116 | 147591 |
| 117 | 147592 |
| 118 | 147604 |
| 119 | 147670 |
| 120 | 147682 |
| 121 | 147695 |
| 122 | 147715 |
| 123 | 147722 |
| 124 | 147742 |
| 125 | 147751 |
| 126 | 147754 |
| 127 | 147786 |
| 128 | 147789 |

|     |        |
|-----|--------|
| 129 | 147802 |
| 130 | 147806 |
| 131 | 147807 |
| 132 | 147809 |
| 133 | 147810 |
| 134 | 147816 |
| 135 | 147817 |
| 136 | 147825 |
| 137 | 147830 |
| 138 | 147834 |
| 139 | 147864 |
| 140 | 147884 |
| 141 | 147887 |
| 142 | 147888 |
| 143 | 147889 |
| 144 | 147900 |
| 145 | 147907 |
| 146 | 147912 |
| 147 | 147913 |
| 148 | 147919 |
| 149 | 147921 |
| 150 | 147927 |
| 151 | 147930 |
| 152 | 147936 |
| 153 | 147940 |
| 154 | 147949 |
| 155 | 147972 |
| 156 | 147979 |
| 157 | 147980 |
| 158 | 147986 |
| 159 | 147994 |
| 160 | 148008 |
| 161 | 148015 |
| 162 | 148019 |
| 163 | 148032 |
| 164 | 148033 |
| 165 | 148038 |
| 166 | 148049 |
| 167 | 148050 |
| 168 | 148052 |
| 169 | 148066 |
| 170 | 148076 |
| 171 | 148078 |

|     |        |
|-----|--------|
| 172 | 148097 |
| 173 | 148100 |
| 174 | 148107 |
| 175 | 148166 |
| 176 | 148186 |
| 177 | 148187 |
| 178 | 148191 |
| 179 | 148198 |
| 180 | 148201 |
| 181 | 148202 |
| 182 | 148214 |
| 183 | 148225 |
| 184 | 148237 |
| 185 | 148246 |
| 186 | 148251 |
| 187 | 148257 |
| 188 | 148261 |
| 189 | 148263 |
| 190 | 148264 |
| 191 | 148267 |
| 192 | 148269 |
| 193 | 148272 |
| 194 | 148299 |
| 195 | 148322 |
| 196 | 148339 |
| 197 | 148345 |
| 198 | 148349 |
| 199 | 148351 |
| 200 | 148362 |
| 201 | 148384 |
| 202 | 148385 |
| 203 | 148396 |
| 204 | 148433 |
| 205 | 148439 |
| 206 | 148457 |
| 207 | 148459 |
| 208 | 148468 |
| 209 | 148472 |
| 210 | 148482 |
| 211 | 148492 |
| 212 | 148528 |
| 213 | 148537 |
| 214 | 148540 |

|     |        |
|-----|--------|
| 215 | 148558 |
| 216 | 148562 |
| 217 | 148574 |
| 218 | 148576 |
| 219 | 148578 |
| 220 | 148579 |
| 221 | 148584 |
| 222 | 148587 |
| 223 | 148591 |
| 224 | 148597 |
| 225 | 148608 |
| 226 | 148609 |
| 227 | 148617 |
| 228 | 148621 |
| 229 | 148635 |
| 230 | 148643 |
| 231 | 148649 |
| 232 | 148653 |
| 233 | 148654 |
| 234 | 148661 |
| 235 | 148676 |
| 236 | 148678 |
| 237 | 148679 |
| 238 | 148686 |
| 239 | 148687 |
| 240 | 148688 |
| 241 | 14962  |
| 242 | 16681  |
| 243 | 168564 |
| 244 | 168571 |
| 245 | 168572 |
| 246 | 168595 |
| 247 | 168636 |
| 248 | 168637 |
| 249 | 168638 |
| 250 | 168642 |
| 251 | 168653 |
| 252 | 168658 |
| 253 | 168672 |
| 254 | 168673 |
| 255 | 168674 |
| 256 | 168688 |
| 257 | 168689 |

|     |        |
|-----|--------|
| 258 | 168701 |
| 259 | 168708 |
| 260 | 168753 |
| 261 | 168758 |
| 262 | 168769 |
| 263 | 168776 |
| 264 | 168794 |
| 265 | 168806 |
| 266 | 168807 |
| 267 | 168810 |
| 268 | 168824 |
| 269 | 168832 |
| 270 | 168838 |
| 271 | 168846 |
| 272 | 168867 |
| 273 | 168878 |
| 274 | 168882 |
| 275 | 168893 |
| 276 | 168898 |
| 277 | 168908 |
| 278 | 168913 |
| 279 | 168925 |
| 280 | 168927 |
| 281 | 168928 |
| 282 | 168936 |
| 283 | 168944 |
| 284 | 168946 |
| 285 | 168950 |
| 286 | 168955 |
| 287 | 168964 |
| 288 | 168973 |
| 289 | 168977 |
| 290 | 168979 |
| 291 | 168998 |
| 292 | 169018 |
| 293 | 169051 |
| 294 | 169059 |
| 295 | 169079 |
| 296 | 169105 |
| 297 | 169110 |
| 298 | 169126 |
| 299 | 169143 |
| 300 | 169148 |

|     |        |
|-----|--------|
| 301 | 169167 |
| 302 | 169169 |
| 303 | 169171 |
| 304 | 169203 |
| 305 | 169211 |
| 306 | 169221 |
| 307 | 169226 |
| 308 | 169253 |
| 309 | 169282 |
| 310 | 169306 |
| 311 | 169322 |
| 312 | 169323 |
| 313 | 169328 |
| 314 | 169373 |
| 315 | 169388 |
| 316 | 169393 |
| 317 | 169399 |
| 318 | 169400 |
| 319 | 169403 |
| 320 | 169412 |
| 321 | 17280  |
| 322 | 17283  |
| 323 | 17295  |
| 324 | 17299  |
| 325 | 17302  |
| 326 | 17304  |
| 327 | 17327  |
| 328 | 17328  |
| 329 | 17336  |
| 330 | 17354  |
| 331 | 17388  |
| 332 | 17394  |
| 333 | 17431  |
| 334 | 17446  |
| 335 | 17464  |
| 336 | 17465  |
| 337 | 17470  |
| 338 | 17474  |
| 339 | 17489  |
| 340 | 17490  |
| 341 | 17499  |
| 342 | 17506  |
| 343 | 17517  |



|     |       |
|-----|-------|
| 344 | 17592 |
| 345 | 17614 |
| 346 | 17619 |
| 347 | 17752 |
| 348 | 17810 |
| 349 | 17835 |
| 350 | 17848 |
| 351 | 17853 |
| 352 | 17854 |
| 353 | 17858 |
| 354 | 17863 |
| 355 | 17880 |
| 356 | 17896 |
| 357 | 17904 |
| 358 | 17946 |
| 359 | 17953 |
| 360 | 17961 |
| 361 | 18739 |
| 362 | 19007 |
| 363 | 19008 |
| 364 | 19605 |
| 365 | 19606 |
| 366 | 21498 |
| 367 | 24136 |
| 368 | 24199 |
| 369 | 24217 |
| 370 | 24226 |
| 371 | 25557 |
| 372 | 25593 |
| 373 | 25611 |
| 374 | 25728 |
| 375 | 26160 |
| 376 | 27291 |
| 377 | 27318 |
| 378 | 27350 |
| 379 | 27536 |
| 380 | 27541 |
| 381 | 27551 |
| 382 | 27558 |
| 383 | 27568 |
| 384 | 27571 |
| 385 | 27572 |
| 386 | 27578 |

|     |       |
|-----|-------|
| 387 | 27676 |
| 388 | 27740 |
| 389 | 27821 |
| 390 | 27833 |
| 391 | 27855 |
| 392 | 27953 |
| 393 | 27968 |
| 394 | 28038 |
| 395 | 28098 |
| 396 | 28393 |
| 397 | 28444 |
| 398 | 28450 |
| 399 | 28488 |
| 400 | 28547 |
| 401 | 28568 |
| 402 | 28624 |
| 403 | 28684 |
| 404 | 28769 |
| 405 | 28876 |
| 406 | 28884 |
| 407 | 28929 |
| 408 | 28944 |
| 409 | 28979 |
| 410 | 29001 |
| 411 | 29056 |
| 412 | 29138 |
| 413 | 29146 |
| 414 | 29544 |
| 415 | 29575 |
| 416 | 29650 |
| 417 | 29837 |
| 418 | 30147 |
| 419 | 30207 |
| 420 | 30747 |
| 421 | 30756 |
| 422 | 31388 |
| 423 | 32608 |
| 424 | 32731 |
| 425 | 32812 |
| 426 | 32891 |
| 427 | 32946 |
| 428 | 33114 |
| 429 | 33163 |

|     |       |
|-----|-------|
| 430 | 42444 |
| 431 | 42454 |
| 432 | 42488 |
| 433 | 42492 |
| 434 | 42499 |
| 435 | 42501 |
| 436 | 42502 |
| 437 | 42504 |
| 438 | 42516 |
| 439 | 42522 |
| 440 | 42523 |
| 441 | 42532 |
| 442 | 42539 |
| 443 | 42540 |
| 444 | 42550 |
| 445 | 42572 |
| 446 | 42590 |
| 447 | 42592 |
| 448 | 42594 |
| 449 | 42595 |
| 450 | 42596 |
| 451 | 42610 |
| 452 | 42617 |
| 453 | 42619 |
| 454 | 42620 |
| 455 | 42624 |
| 456 | 42638 |
| 457 | 42644 |
| 458 | 42654 |
| 459 | 42656 |
| 460 | 42658 |
| 461 | 42666 |
| 462 | 42672 |
| 463 | 42679 |
| 464 | 42680 |
| 465 | 42700 |
| 466 | 42707 |
| 467 | 42712 |
| 468 | 42748 |
| 469 | 42749 |
| 470 | 42751 |
| 471 | 42770 |
| 472 | 42776 |

|     |       |
|-----|-------|
| 473 | 42788 |
| 474 | 42793 |
| 475 | 42807 |
| 476 | 42812 |
| 477 | 42839 |
| 478 | 42845 |
| 479 | 42846 |
| 480 | 42868 |
| 481 | 42870 |
| 482 | 42874 |
| 483 | 42879 |
| 484 | 42888 |
| 485 | 42892 |
| 486 | 42894 |
| 487 | 42898 |
| 488 | 42902 |
| 489 | 42913 |
| 490 | 42941 |
| 491 | 42951 |
| 492 | 42962 |
| 493 | 42966 |
| 494 | 46202 |
| 495 | 46204 |
| 496 | 46221 |
| 497 | 46258 |
| 498 | 46259 |
| 499 | 46264 |
| 500 | 46266 |
| 501 | 46297 |
| 502 | 46310 |
| 503 | 46346 |
| 504 | 46347 |
| 505 | 46354 |
| 506 | 46368 |
| 507 | 46404 |
| 508 | 46415 |
| 509 | 46422 |
| 510 | 46427 |
| 511 | 46429 |
| 512 | 46435 |
| 513 | 46440 |
| 514 | 46443 |
| 515 | 46453 |

|     |       |
|-----|-------|
| 516 | 46479 |
| 517 | 46518 |
| 518 | 46556 |
| 519 | 46558 |
| 520 | 46606 |
| 521 | 46616 |
| 522 | 46633 |
| 523 | 46636 |
| 524 | 46698 |
| 525 | 46724 |
| 526 | 46731 |
| 527 | 46734 |
| 528 | 46735 |
| 529 | 46738 |
| 530 | 46752 |
| 531 | 46788 |
| 532 | 46802 |
| 533 | 46806 |
| 534 | 46810 |
| 535 | 46835 |
| 536 | 46923 |
| 537 | 46925 |
